# Supplementary material for: The role of self-management in endometriosis pain: insights from a cross-sectional survey in Germany, Austria, and Switzerland
Source: Springer Nature journal article supplement (doi:10.1007/s00404-025-08019-1), 2025-04-19
Supplement: MOESM1 [file 404_2025_8019_MOESM1_ESM.pdf]

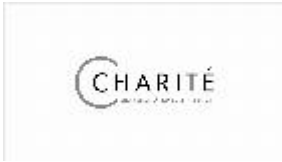

---

CannabisEM → base

07.07.2022, 13:53

**INO1**

## Sehr geehrte Studieninteressierte,

Endometriose (EM) ist eine chronisch-entzündliche Erkrankung, von der ca. 10% der Frauen im reproduktionsfähigem Alter betroffen sind, also etwa 2 Millionen Menschen in Deutschland und 270 Millionen weltweit. EM ist durch das Wachstum von uterus-schleimhautähnlichen Zellverbänden außerhalb der Gebärmutterhöhle charakterisiert. Häufige Symptome sind wiederkehrende oder chronische Schmerzen, übermäßige Erschöpfung und Fruchtbarkeitsprobleme, welche die psychische Gesundheit, Sexualität, Arbeitsfähigkeit und allgemeine Lebensqualität der Patient\*innen erheblich beeinträchtigen. Bis heute gibt es keine kausale Therapie.

Die Erkrankung Endometriose wird häufig mit Schmerzmitteln behandelt, aber auch mit nicht-pharmakologischen, also komplementären Verfahren. Wir sind an Ihren Erfahrungen zur Selbstbehandlung interessiert. Dabei interessieren uns die Einnahme von Schmerzmitteln, aber auch andere Maßnahmen wie das Erlernen von Entspannungstechniken, Yoga-Übungen, Atemtechniken oder Ernährungsumstellungen, genauso wie die Verwendung von Alkohol oder Cannabis. Wir möchten untersuchen, wie Menschen mit Endometriose versuchen, ihre Schmerzen zu lindern und welche Erfahrungen sie damit haben.

Die folgenden Informationen sollen Sie über das Forschungsprojekt informieren und Ihnen helfen, sich zu entscheiden, ob Sie daran teilnehmen möchten. Bitte nehmen Sie sich Zeit, diese Informationen aufmerksam zu lesen.

Was ist das Ziel dieses Forschungsprojektes?

In einem umfassenden und ganzheitlichen Fragebogendesign wird in diesem Projekt die Stärke von Endometriose-assoziierten Schmerzen unter Einsatz unterschiedlicher Behandlungsmaßnahmen (sowohl pharmakologisch als nicht-pharmakologisch) untersucht. Die Erhebung dieser Daten gibt uns Einblicke in Ihren Bedarf und lässt uns an Ihren Erfahrungen teilnehmen. So können wir künftige Therapiestrategien besser an Ihre Bedürfnisse anpassen.

Beruhet die Teilnahme an dem Forschungsprojekt auf Freiwilligkeit?

Ihre Teilnahme an dem Forschungsprojekt beruht auf Freiwilligkeit. Falls Sie nicht teilnehmen möchten, entstehen Ihnen daraus keine Nachteile. Das Ausfüllen des Fragebogens nimmt ca. 15 bis 40 Minuten in Anspruch.

Was passiert, wenn ich an diesem Forschungsprojekt teilnehme?

Wenn Sie auf "Ja" für Ihre Einwilligung klicken, werden Sie automatisch zum Online-Fragebogen weitergeleitet.

Was sind mögliche Risiken und Vorteile, falls ich an dem Forschungsprojekt teilnehme?

Es entstehen keine Risiken für Sie durch die Teilnahme an der Studie. Die Teilnahme hat keinen Einfluss auf Ihre medizinische Behandlung. Durch die Teilnahme an dem Forschungsprojekt werden Ihnen keine Kosten entstehen.

Ihre Teilnahme kann weiterhin dazu beitragen, dass in Zukunft bessere Therapiemöglichkeiten für Menschen mit Endometriose zur Verfügung stehen.

Verarbeitung Ihrer personenbezogenen Daten

Im Rahmen unserer Umfrage erheben und verarbeiten wir personenbezogene Daten, wie z.B. Informationen über Alter, Geschlecht, Angaben zu Schulausbildung und Berufstätigkeit, Familiengröße, chronische Erkrankungen, ohne aber den Namen oder eindeutige Bezugsgrößen zu erheben, die einen unmittelbaren Bezug zu Ihrer Person ermöglichen. Die Teilnahme an dieser Umfrage erfolgt ohne die Nennung Ihres Namens oder Daten, die eine Identifikation ermöglichen. Eine Registrierung über das Online-Portal ist für die Teilnahme nicht erforderlich. Sofern es sich aufgrund der spezifischen Antworten um personenbeziehbare Daten handelt, werden wir diese vertraulich behandeln.

Grundsätzlich können aufgrund der Anonymität der Umfrage und mangels Personenbeziehbarkeit/ Rückverfolgbarkeit die Rechte auf Auskunft, Berichtigung, Löschung und Widerruf nicht geltend gemacht werden. Sollte jedoch im Einzelfall aufgrund der Beantwortung der Fragen ein Rückschluss auf Ihre Identität möglich sein, steht Ihnen das Fragerecht und das Beschwerderecht zur Verfügung.

Bitte beachten Sie, dass die Ergebnisse der Studie in der medizinischen Fachliteratur veröffentlicht werden können, wobei Ihre Identität jedoch nicht bekannt wird, weil wir die personenbeziehbaren Daten entfernen.

Die gesammelten Daten und Ergebnisse werden für einen Zeitraum von mindestens 10 Jahren vom Klinikum aufbewahrt werden. Sie dürfen von spezialisierten Dienstleistern in gesicherten Bereichen aufbewahrt bzw. gespeichert werden entsprechend den Datenschutzgesetzen. Die im Rahmen dieses Forschungsprojektes erhobenen Daten werden eventuell für zukünftige Forschungsprojekte auf dem Gebiet der Endometriose verwendet und nicht ohne Ihre gesonderte Einwilligung in ein Drittland ohne angemessenes Datenschutzniveau weitergeben. Sie können sich über Nachfragen bei der Studienleitung über die Verwendung Ihrer Daten aktuell informieren.

Im Falle von Fragen oder Anmerkungen, wenden Sie sich gerne an: die Studienleitung, die die für die Verarbeitung der personenbezogenen Daten verantwortliche Stelle darstellt:

Prof. Dr. med. Sylvia Mechsner  
Abteilung für Gynäkologie  
Augustenburger Platz 1, 13353 Berlin  
Tel: 0049 30 450 664866  
E-mail: [sylvia.mechsner@charite.de](mailto:sylvia.mechsner@charite.de)

Bei Anliegen zur Datenverarbeitung und zur Einhaltung der datenschutzrechtlichen Anforderungen können Sie sich auch an die Stabsstelle Datenschutz der Charité wenden:

Stabsstelle Datenschutz  
Charitéplatz 1, 10117 Berlin

Telefon: 030 450580016

E-Mail: [datenschutz@charite.de](mailto:datenschutz@charite.de)

Für den Fall, dass Sie eine Datenverarbeitung für rechtswidrig halten, haben Sie neben der Inanspruchnahme gerichtlicher Hilfe die Möglichkeit, Beschwerde einzureichen bei der für die Charité Universitätsmedizin Berlin zuständigen Aufsichtsbehörde. Dies ist die

Berliner Beauftragte für Datenschutz und Informationsfreiheit

Friedrichstraße 219, 10969 Berlin.

Telefon: +49 30 13889-0

Fax: +49 30 2155050

E-Mail: [mailbox@datenschutz-berlin.de](mailto:mailbox@datenschutz-berlin.de)

Bleibt meine Teilnahme an dem Forschungsprojekt vertraulich?

Ihre Teilnahme an dem Forschungsprojekt wird vertraulich behandelt. Im Rahmen des Forschungsprojektes werden besondere Sicherheitsmaßnahmen ergriffen, um einen unerlaubten Zugriff auf Ihre Daten zu verhindern. Ihre Daten werden nur pseudonymisiert verwendet und können so Ihrer Person nicht zugeordnet werden. Auch die im Rahmen des Forschungsprojektes gewonnenen Ergebnisse weisen keinen Bezug zu Ihrer Person auf. Die Ergebnisse der Untersuchungen werden nicht in Ihre Krankenakte am Klinikum aufgenommen und werden nicht an Ihre Ärzt\*innen oder Ihre Krankenkasse weitergegeben.

Werde ich über die Ergebnisse des Forschungsprojektes informiert?

Das Forschungsprojekt dient der Evaluation von komplementären und gängigen Therapieverfahren, die von Menschen mit Endometriose angewandt werden. Dies ist ein langwieriger Prozess. Die im Rahmen des Forschungsprojektes gewonnenen Ergebnisse sind grundlegender Natur. Sie werden sehr wahrscheinlich keine Erkenntnisse liefern, die einen unmittelbaren Einfluss auf Entscheidungen über Ihre jetzige Behandlung haben. Sie werden daher nicht über die Ergebnisse informiert.

Was passiert mit den Ergebnissen des Forschungsprojektes und habe ich einen kommerziellen Vorteil?

Die Ergebnisse oder Teile davon können in wissenschaftlichen Zeitschriften, Büchern oder auf Kongressen veröffentlicht werden. Die Veröffentlichungen und Berichte werden keinen Bezug zu Ihrer Person enthalten.

Das Klinikum darf die Ergebnisse wirtschaftlich nutzen, wie z.B. für die Entwicklung von medizinischen Tests, Therapien und Diagnoseverfahren.

Aus der Bereitstellung und Verwendung Ihrer pseudonymisierten Daten bzw. aus der wirtschaftlichen Nutzung der erzielten Ergebnisse oder der entwickelten pharmazeutischen und diagnostischen Produkte entstehen für Sie keine finanziellen oder anderweitigen Ansprüche. Ihnen entstehen keine Kosten und Sie erhalten keine finanzielle Aufwandsentschädigung für Ihre Teilnahme.

Kann ich die Teilnahme an diesem Forschungsprojekt widerrufen?

Ihre Einwilligung zur Überlassung der Daten ist freiwillig. Sie können jederzeit ohne Angabe von Gründen die Teilnahme an dem Forschungsprojekt beenden. Dies hat keinerlei Auswirkung auf Ihre medizinische Behandlung. Aufgrund der Anonymität der Umfrage und mangels Personenbeziehbarkeit/Rückverfolgbarkeit können die Rechte auf Auskunft, Berichtigung, Löschung und Widerruf nicht geltend gemacht werden.

Versicherung

Für diese Studie wurde keine spezielle Versicherung für die Studienteilnehmer\*innen abgeschlossen. Die an der Studie beteiligten Mitarbeiter\*innen der Charité (Studienärzt\*innen, Studienpfleger\*innen) sind durch die Betriebshaftpflichtversicherung der Charité gegen Haftpflichtansprüche, welche aus ihrem schuldhaften Verhalten resultieren könnten, versichert.

Prof. Dr. med. Sylvia Mechsner  
Studienleiterin

Prof. Dr. med. Jalid Sehouli  
Leiter der Klinik für Gynäkologie

KONTAKTADRESSEN:

Studienleiterin Prof. Dr. med. Sylvia Mechsner

Abteilung für Gynäkologie, Charité-Universitätsmedizin Berlin, Campus Virchow Klinikum, Augustenburger Platz 1, 13353 Berlin, Germany

Tel: 0049 30 450664866, e-mail: [sylvia.mechsner@charite.de](mailto:sylvia.mechsner@charite.de)

## Einverständniserklärung

Einwilligung in die Verarbeitung meiner personenbezogenen Daten:

Mir ist bekannt, dass bei dieser Studie personenbezogene insbesondere auch sensible Daten zu Gesundheit, Geschlecht, Alter, Familienstand und Bildungsabschluss verarbeitet werden sollen. Die Verarbeitung der Daten setzt gemäß Art. 6 Abs. 1 lit. a, Art. 9 Abs. 2 lit. a der Datenschutz-Grundverordnung (DS-GVO) die Abgabe folgender Einwilligungserklärung voraus:

Ich wurde anhand des Informationsblattes ausführlich und verständlich darüber aufgeklärt, dass meine in der Studie erhobenen Daten, insbesondere Angaben über meine Gesundheit und mein Geschlecht, Alter, Familienstand und Bildungsabschluss sowie Informationen über meine Gesundheit zu den in dem Informationsblatt zur Studie beschriebenen Zwecken erhoben und in pseudonymisierter Form gespeichert und ausgewertet werden. Ich bin damit einverstanden, dass die Studienergebnisse in anonymer Form veröffentlicht werden dürfen und dass bei medizinischen Journalen die Datensätze ohne Pseudonym hinterlegt werden dürfen.

Mir ist bekannt, dass eine Rückverfolgung der Datenverarbeitung ausgeschlossen ist, sodass ich meine Rechte auf Auskunft, Berichtigung oder Löschung nicht mehr durchsetzen kann. Außerdem kann ich Beschwerde bei einer Datenschutzbehörde einlegen.

Der Anonymisierung meiner personenbezogenen Daten zum Zwecke der Veröffentlichung oder Weitergabe an Kooperationspartner stimme ich zu.

Ich wurde darüber aufgeklärt, dass ich meine Einwilligung in die Datenverarbeitung jederzeit für die Zukunft widerrufen kann und dass der Widerruf die Rechtmäßigkeit der bereits erfolgten Datenverarbeitung nicht berührt. Der Widerruf hat zudem keine Auswirkungen, sollte hierdurch die Durchführung des Forschungsvorhabens unmöglich oder ernsthaft beeinträchtigt werden. Eine Ausfertigung der Informationen und der Einwilligungserklärung kann ich jederzeit unter <https://.....>

- Ja, ich möchte an der Befragung teilnehmen, bin über 18 Jahre alt und bin damit einverstanden, dass meine Daten
- in anonymisierter Form für wissenschaftliche Zwecke verwendet werden. (leitet weiter zum Beginn des Fragebogens)
  - Nein, ich möchte an der Befragung nicht teilnehmen.

### 1 aktive(r) Filter

#### Filter IN02/F1

Wenn eine der folgenden Antwortoption(en) ausgewählt wurde: **2**

Dann nach dem Klick auf "Weiter" den Text **IN03** anzeigen und das Interview beenden

**1. Wie alt sind Sie?**

SD02

Ich bin  Jahre**2. In welchem Land leben Sie derzeit?**

SD07

- Deutschland  
 Österreich  
 Schweiz

**3. Welches ist der höchste Bildungsabschluss, den Sie haben?**

SD10

- Noch Schülerin  
 Schule beendet ohne Abschluss  
 Hauptschulabschluss/Volksschulabschluss  
 Realschulabschluss (Mittlere Reife)  
 Abschluss Polytechnische Oberschule 10. Klasse (vor 1965: 8. Klasse)  
 Fachhochschulreife (Abschluss einer Fachoberschule)  
 Abitur, allgemeine oder fachgebundene Hochschulreife (Gymnasium bzw. EOS)  
 Hochschulabschluss  
 Anderer Schulabschluss:

**4. Welchen beruflichen Bildungsabschluss haben Sie?**

SD12

Bitte wählen Sie den höchsten Bildungsabschluss, den Sie bisher erreicht haben.

- Keinen beruflichen Ausbildungsabschluss  
 Beruflich-betriebliche Anlernzeit mit Abschlusszeugnis, aber keine Lehre  
 Teilfacharbeiterabschluss  
 Abgeschlossene gewerbliche oder landwirtschaftliche Lehre  
 Abgeschlossene kaufmännische Lehre  
 Berufliches Praktikum, Volontariat  
 Berufsfachschulabschluss  
 Fachschulabschluss  
 Meister-, Techniker- oder gleichwertiger Fachschulabschluss  
 Fachhochschulabschluss  
 Hochschulabschluss  
 Anderer Abschluss, und zwar:

SD13

**5. Sind Sie momentan erwerbstätig?**

- Ja, ich bin erwerbstätig.
- Nein, ich bin arbeitslos.
- Nein, ich bin Rentnerin.
- Nein, ich bin Hausfrau.
- Nein, ich bin nichts von alledem.

**6. Wie hoch ist ungefähr Ihr monatliches Nettoeinkommen?**

SD16

Gemeint ist der Betrag, der sich aus allen Einkünften zusammensetzt und nach Abzug der Steuern und Sozialversicherungen übrig bleibt.

- Ich habe kein eigenes Einkommen
- unter 500 €
- 500 € bis unter 1000 €
- 1000 € bis unter 1500 €
- 1500 € bis unter 2000 €
- 2000 € bis unter 2500 €
- 2500 € bis unter 3000 €
- 3000 € oder mehr

**7. Wie ist Ihr aktueller Familienstand? (Mehrfachantwort möglich)**

SD19

- ledig, keine Beziehung
- alleinerziehend
- verheiratet bzw. eingetragene Partnerschaft
- in einer festen Partnerschaft
- geschieden
- Sonstiges

**8. Haben Sie das Gefühl, dass Ihre Endometriose Ihre Partnerschaft belastet?**

SD18

Hinweis: Belastungen durch die Endometriose können beispielsweise durch Schmerzen im Allgemeinen, Schmerzen beim Geschlechtsverkehr, verminderte Libido oder Lubrikation durch eine Hormonbehandlung oder Fertilitätsbeeinträchtigungen bestehen.

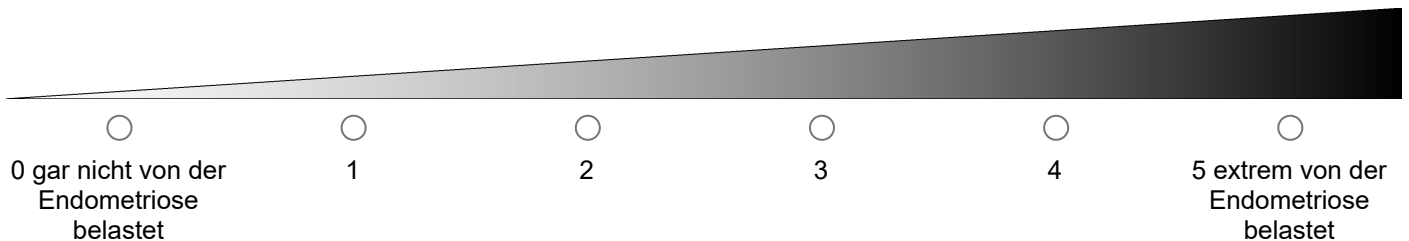

SD20

**9. Haben Sie das Gefühl, dass Ihre Endometriose Ihre letzte Partnerschaft belastet hat?**

Hinweis: Belastungen durch die Endometriose können beispielsweise durch Schmerzen im Allgemeinen, Schmerzen beim Geschlechtsverkehr, verminderte Libido oder Lubrikation, eine Hormonbehandlung oder Fertilitätsbeeinträchtigungen bestehen.

0 gar nicht von der Endometriose belastet      1      2      3      4      5 extrem von der Endometriose belastet

**10. Haben Sie eine bösartige Erkrankung oder eine Infektion? (Bsp.: Krebserkrankung, Tuberkulose, Hepatitis A/B/C)** SD17

- Nein  
 Ja

**11. Rauchen Sie Zigaretten?** SD21

- Nein  
 Ja

**12. Wann wurde bei Ihnen Endometriose diagnostiziert?**EM01 

(bitte Monat und Jahr angeben)

**13. Wann traten bei Ihnen zum ersten Mal endometriosetypische Beschwerden auf?**EM02 

bitte Jahr angeben

**14. Wie wurde bei Ihnen Endometriose diagnostiziert?**EM03 

- Bauchspiegelung/Laparoskopie/operativer Eingriff
- MRT
- Ultraschall
- Sonstiges

**15. Sind Sie schon einmal wegen Endometriose oder Verdacht auf Endometriose operiert worden?**EM04 

- Nein
- Ja

**8 aktive(r) Filter****Filter EM04/F1**

Wenn eine der folgenden Antwortoption(en) ausgewählt wurde: **2**  
Dann Seite(n) **OP** des Fragebogens anzeigen (sonst ausblenden)

**Filter EM04/F2**

Wenn eine der folgenden Antwortoption(en) ausgewählt wurde: **2**  
Dann Seite(n) **OP** des Fragebogens anzeigen (sonst ausblenden)

**Filter EM04/F3**

Wenn eine der folgenden Antwortoption(en) ausgewählt wurde: **1**  
Dann Frage/Text **EM05** später im Fragebogen ausblenden

**Filter EM04/F4**

Wenn eine der folgenden Antwortoption(en) ausgewählt wurde: **1**  
Dann Frage/Text **EM06** später im Fragebogen ausblenden

**Filter EM04/F5**

Wenn eine der folgenden Antwortoption(en) ausgewählt wurde: **-9**  
Dann Frage/Text **EM05** später im Fragebogen ausblenden

**Filter EM04/F6**

Wenn eine der folgenden Antwortoption(en) ausgewählt wurde: **-9**  
Dann Frage/Text **EM06** später im Fragebogen ausblenden

**Filter EM04/F7**

Wenn eine der folgenden Antwortoption(en) ausgewählt wurde: **2**  
Dann Frage/Text **EM17** später im Fragebogen anzeigen (sonst ausblenden)

**Filter EM04/F8**

Wenn eine der folgenden Antwortoption(en) ausgewählt wurde: **2**  
Dann Frage/Text **EM18** später im Fragebogen anzeigen (sonst ausblenden)

16. Wie viele Operationen hatten Sie bereits insgesamt aufgrund Ihrer Endometriose?

EM05

- 1 Operation
- 2 Operationen
- 3 Operationen
- 4 Operationen
- 5 Operationen
- mehr als 5 Operationen

17. Wurde die Operation in einem zertifizierten Endometriosezentrum durchgeführt?

EM06

- Nein
- Ja
- Ich weiß es nicht

18. Welches ASF/ rASRM-Stadium ist angegeben?

EM17

(Mehrfachantwort möglich)

- Keine Angabe     I     II     III     IV

19. Was ist nach ENZIAN-Klassifikation angegeben?

EM18

(Mehrfachantwort möglich)

- |                             |                             |                             |                             |                                       |
|-----------------------------|-----------------------------|-----------------------------|-----------------------------|---------------------------------------|
| <input type="checkbox"/> A1 | <input type="checkbox"/> A2 | <input type="checkbox"/> A3 | <input type="checkbox"/> FA | <input type="checkbox"/> FI           |
| <input type="checkbox"/> B1 | <input type="checkbox"/> B2 | <input type="checkbox"/> B3 | <input type="checkbox"/> FB | <input type="checkbox"/> FO           |
| <input type="checkbox"/> C1 | <input type="checkbox"/> C2 | <input type="checkbox"/> C3 | <input type="checkbox"/> FU | <input type="checkbox"/> keine Angabe |

**20. Wie viele verschiedene Hormonpräparate haben Sie schon zur Behandlung der Endometriose angewendet? (Inkl. aktuellem Präparat)** EM07

- 0 Präparate
- 1 Präparat
- 2 Präparate
- 3 Präparate
- 4 Präparate
- 5 Präparate
- mehr als 5 Präparate

### 3 aktive(r) Filter

#### Filter EM07/F1

Wenn eine der folgenden Antwortoption(en) ausgewählt wurde: 7  
Dann Frage/Text **EM19** später im Fragebogen ausblenden

#### Filter EM07/F2

Wenn eine der folgenden Antwortoption(en) ausgewählt wurde: 7  
Dann Frage/Text **EM08** später im Fragebogen ausblenden

#### Filter EM07/F3

Wenn eine der folgenden Antwortoption(en) ausgewählt wurde: 7  
Dann Frage/Text **EM09** später im Fragebogen ausblenden

**21. Sind Sie Blutungsfrei?**

EM20

Gemeint ist, ob die Einnahme von aktuellen Medikamenten dazu führt, dass Ihre Regelblutung unterbunden wird.

- Ja
- Nein

**22. Haben Sie Schmerzen wegen der Endometriose?**EM10 

Zyklusabhängige Unterbauchschmerzen

Nein

Ja

Zyklusunabhängige Unterbauchschmerzen

Nein

Ja

Schmerzhafte Menstruation, typischerweise mit Bauchkrämpfen

Nein

Ja

Schwieriger oder schmerzhafter Geschlechtsverkehr

Nein

Ja

Schmerzen oder Schwierigkeiten beim Stuhlgang

Nein

Ja

Schmerzhafte Wasserlassen als Unbehagen oder Brennen beim Wasserlassen

Nein

Ja

EM11 

**23. Welche Medikamente haben Sie bisher gegen Endometriose-assoziierte Schmerzen eingenommen?**

|                          |                                  |                                                                         |                                                           |
|--------------------------|----------------------------------|-------------------------------------------------------------------------|-----------------------------------------------------------|
| Diclofenac               | <input type="checkbox"/> Niemals | <input type="checkbox"/> Ja, ich habe schon eingenommen (Vergangenheit) | <input type="checkbox"/> Ja, ich nehme jetzt (heutzutage) |
| Buscopan                 | <input type="checkbox"/> Niemals | <input type="checkbox"/> Ja, ich habe schon eingenommen (Vergangenheit) | <input type="checkbox"/> Ja, ich nehme jetzt (heutzutage) |
| Acetylsalicylsäure (ASS) | <input type="checkbox"/> Niemals | <input type="checkbox"/> Ja, ich habe schon eingenommen (Vergangenheit) | <input type="checkbox"/> Ja, ich nehme jetzt (heutzutage) |
| Celecoxib                | <input type="checkbox"/> Niemals | <input type="checkbox"/> Ja, ich habe schon eingenommen (Vergangenheit) | <input type="checkbox"/> Ja, ich nehme jetzt (heutzutage) |
| Ibuprofen                | <input type="checkbox"/> Niemals | <input type="checkbox"/> Ja, ich habe schon eingenommen (Vergangenheit) | <input type="checkbox"/> Ja, ich nehme jetzt (heutzutage) |
| Paracetamol              | <input type="checkbox"/> Niemals | <input type="checkbox"/> Ja, ich habe schon eingenommen (Vergangenheit) | <input type="checkbox"/> Ja, ich nehme jetzt (heutzutage) |
| Metamizol                | <input type="checkbox"/> Niemals | <input type="checkbox"/> Ja, ich habe schon eingenommen (Vergangenheit) | <input type="checkbox"/> Ja, ich nehme jetzt (heutzutage) |
| Tramadol                 | <input type="checkbox"/> Niemals | <input type="checkbox"/> Ja, ich habe schon eingenommen (Vergangenheit) | <input type="checkbox"/> Ja, ich nehme jetzt (heutzutage) |
| Tilidin                  | <input type="checkbox"/> Niemals | <input type="checkbox"/> Ja, ich habe schon eingenommen (Vergangenheit) | <input type="checkbox"/> Ja, ich nehme jetzt (heutzutage) |
| Dihydrocodein            | <input type="checkbox"/> Niemals | <input type="checkbox"/> Ja, ich habe schon eingenommen (Vergangenheit) | <input type="checkbox"/> Ja, ich nehme jetzt (heutzutage) |
| Morphin                  | <input type="checkbox"/> Niemals | <input type="checkbox"/> Ja, ich habe schon eingenommen (Vergangenheit) | <input type="checkbox"/> Ja, ich nehme jetzt (heutzutage) |
| Oxycodon                 | <input type="checkbox"/> Niemals | <input type="checkbox"/> Ja, ich habe schon eingenommen (Vergangenheit) | <input type="checkbox"/> Ja, ich nehme jetzt (heutzutage) |
| Levomethadon             | <input type="checkbox"/> Niemals | <input type="checkbox"/> Ja, ich habe schon eingenommen (Vergangenheit) | <input type="checkbox"/> Ja, ich nehme jetzt (heutzutage) |

|                                                      |         |                                                |                                  |
|------------------------------------------------------|---------|------------------------------------------------|----------------------------------|
| Fentanyl                                             | Niemals | Ja, ich habe schon eingenommen (Vergangenheit) | Ja, ich nehme jetzt (heutzutage) |
| Pethidin                                             | Niemals | Ja, ich habe schon eingenommen (Vergangenheit) | Ja, ich nehme jetzt (heutzutage) |
| Buprenorphin                                         | Niemals | Ja, ich habe schon eingenommen (Vergangenheit) | Ja, ich nehme jetzt (heutzutage) |
| Piritramid                                           | Niemals | Ja, ich habe schon eingenommen (Vergangenheit) | Ja, ich nehme jetzt (heutzutage) |
| Koanalgetika (z.B Antidepressiva, Muskelrelaxanzien) | Niemals | Ja, ich habe schon eingenommen (Vergangenheit) | Ja, ich nehme jetzt (heutzutage) |
| Sonstiges                                            | Niemals | Ja, ich habe schon eingenommen (Vergangenheit) | Ja, ich nehme jetzt (heutzutage) |

**24. Wie wurden die Medikamente beschafft?**EM13 

(Mehrfachnennung möglich)

- Selbstbeschaffung
- Rezept von der/dem Frauenärzt\*in
- Rezept von der/dem Schmerzen Therapeut\*in
- Rezept von der/dem Hausarzt\*in

**25. Wie ist/war die typische Schmerzstärke unter der Schmerzmedikation?**EM15 

|                                    |
|------------------------------------|
| 0 kein Schmerz                     |
| 1                                  |
| 2                                  |
| 3                                  |
| 4                                  |
| 5                                  |
| 6                                  |
| 7                                  |
| 8                                  |
| 9                                  |
| 10 stärkster vorstellbarer Schmerz |

EM16 

**26. Auf einer Skala von 0-10, wie effektiv würden Sie das Medikament für die Reduktion Ihrer endometriosebedingten Unterleibsschmerzen beurteilen?**

|                            |
|----------------------------|
| 0 überhaupt nicht effektiv |
| 1                          |
| 2                          |
| 3                          |
| 4                          |
| 5                          |
| 6                          |
| 7                          |
| 8                          |
| 9                          |
| 10 sehr effektiv           |

**27. Wie heißt Ihr aktuelles Hormonpräparat?**

EM19

Wenn Sie aktuell keine Hormone einnehmen, schreiben Sie bitte „Keine“.

**28. Wie gut vertragen Sie Ihr aktuelles Hormonpräparat?**

EM08

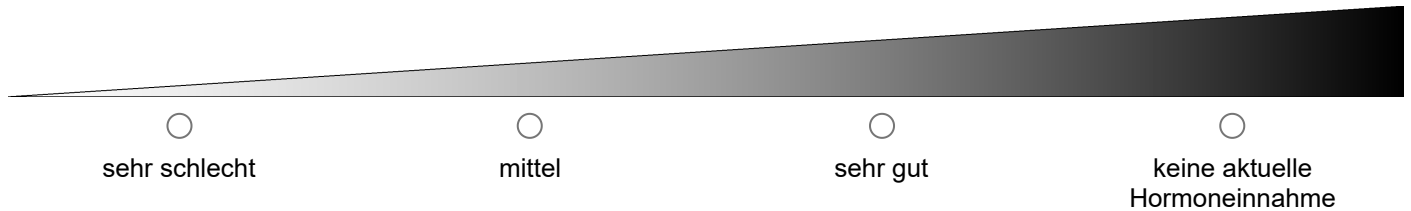**29. Wie ist/war die typische Schmerzstärke unter der Hormontherapie?**

EM21

|                                    |
|------------------------------------|
| 0 kein Schmerz                     |
| 1                                  |
| 2                                  |
| 3                                  |
| 4                                  |
| 5                                  |
| 6                                  |
| 7                                  |
| 8                                  |
| 9                                  |
| 10 stärkster vorstellbarer Schmerz |

**30. Auf einer Skala von 0-10, wie effektiv würden Sie das Hormonpräparat für die Reduktion Ihrer endometriosebedingten Unterleibsschmerzen beurteilen?**

EM09

|                            |
|----------------------------|
| 0 überhaupt nicht effektiv |
| 1                          |
| 2                          |
| 3                          |
| 4                          |
| 5                          |
| 6                          |
| 7                          |
| 8                          |
| 9                          |
| 10 sehr effektiv           |

**31. Wie sehr haben Ihre Unterleibsschmerzen im letzten Monat folgende Aspekte beeinflusst?**

SC01

|                                                                     | gar nicht             | kaum                  | mäßig                 | sehr                  | extrem                |
|---------------------------------------------------------------------|-----------------------|-----------------------|-----------------------|-----------------------|-----------------------|
| Leistung                                                            | <input type="radio"/> | <input type="radio"/> | <input type="radio"/> | <input type="radio"/> | <input type="radio"/> |
| Stimmung                                                            | <input type="radio"/> | <input type="radio"/> | <input type="radio"/> | <input type="radio"/> | <input type="radio"/> |
| Schlaf                                                              | <input type="radio"/> | <input type="radio"/> | <input type="radio"/> | <input type="radio"/> | <input type="radio"/> |
| Verdauung                                                           | <input type="radio"/> | <input type="radio"/> | <input type="radio"/> | <input type="radio"/> | <input type="radio"/> |
| Sitzen (länger als 20 Minuten)                                      | <input type="radio"/> | <input type="radio"/> | <input type="radio"/> | <input type="radio"/> | <input type="radio"/> |
| Alltag zu Hause/ in der Schule/ Uni/ auf der Arbeit                 | <input type="radio"/> | <input type="radio"/> | <input type="radio"/> | <input type="radio"/> | <input type="radio"/> |
| körperliche Aktivitäten (z.B. Joggen, Yoga, Fahrradfahren)          | <input type="radio"/> | <input type="radio"/> | <input type="radio"/> | <input type="radio"/> | <input type="radio"/> |
| Tragen bestimmter Kleidungsstücke (z.B. enge Kleidung/ Unterwäsche) | <input type="radio"/> | <input type="radio"/> | <input type="radio"/> | <input type="radio"/> | <input type="radio"/> |
| Sexualverhalten (z.B. Masturbation, Geschlechtsverkehr)             | <input type="radio"/> | <input type="radio"/> | <input type="radio"/> | <input type="radio"/> | <input type="radio"/> |

**32. Haben Sie in den letzten 6 Monaten nicht-pharmakologische Therapieoptionen (wie z.B. Yoga, Meditation, Entspannungstechniken, Ernährungsumstellung, Wärmeanwendungen, Hanföl) genutzt, um besser mit Ihren Endometriosebeschwerden zurecht zu kommen oder zur Reduktion der Nebenwirkungen von eingenommenen Medikamenten (z.B. Schmerzmedikamente) zur Behandlung der Endometriose?**

SC03

- Nein  
 Ja

**5 aktive(r) Filter**
**Filter SC03/F1**

Wenn eine der folgenden Antwortoption(en) ausgewählt wurde: **2**  
 Dann Frage/Text **SC05** später im Fragebogen anzeigen (sonst ausblenden)

**Filter SC03/F2**

Wenn eine der folgenden Antwortoption(en) ausgewählt wurde: **1**  
 Dann Frage/Text **SC05** später im Fragebogen ausblenden

**Filter SC03/F3**

Wenn eine der folgenden Antwortoption(en) ausgewählt wurde: **1**  
 Dann Frage/Text **SC04** später im Fragebogen anzeigen (sonst ausblenden)

**Filter SC03/F4**

Wenn eine der folgenden Antwortoption(en) ausgewählt wurde: **2**  
 Dann Frage/Text **SC04** später im Fragebogen ausblenden

**Filter SC03/F5**

Wenn eine der folgenden Antwortoption(en) ausgewählt wurde: **1**  
 Dann Seite(n) **YO-CA, OS, TC** des Fragebogens ausblenden

SC04

**33. Aus welchen Gründen nutzen Sie solche Therapieoptionen nicht?**

bitte alle zutreffenden Gründe auswählen, wenn Sie keine solcher nicht-pharmakologischen Maßnahmen nutzen

- Kosten
- Zeitaufwand
- bereits ausprobiert und haben nicht geholfen
- zu wenig Informationen dazu
- schwere Zugangsmöglichkeiten
- weitere

SC05

### 34. Welche von den folgenden nicht-pharmakologischen Maßnahmen zur Bewältigung Ihrer Endometriosebeschwerden haben Sie in den letzten 6 Monaten genutzt?

bitte alle zutreffenden Optionen auswählen

- Yoga/ Pilates
- Tai Chi/ Qi Gong
- Meditation/ Atemübungen
- Ausruhen/ Erholen
- Dehnungsübungen
- sportliche körperliche Aktivitäten (z.B. Spazieren gehen, Joggen, Schwimmen, Krafttraining)
- Wärme (z.B. Wärmekissen, Sauna, warmes Bad)
- Kälte (z.B. Kältekomresse, kalt duschen)
- Akkupunktur
- Osteopathie
- Massage
- Traditionelle chinesische Medizin (TCM)
- Alkoholkonsum
- pflanzliche Beruhigungs-/ Entspannungsmittel (z.B. Substanzen mit Kamille, Kava, Passionsblume)
- bestimmte Ernährungsweisen (z.B. Paleo-Diät, pflanzenbasierte Kost, FODMAP-Diät)
- Hanf-/ CBD-Öl
- Cannabis oder cannabishaltige Produkte (verschrieben oder illegal)
- Sonstiges

#### 17 aktive(r) Filter

##### Filter SC05/F1

Wenn eine der folgenden Antwortoption(en) ausgewählt wurde: 1  
Dann Seite(n) **YO** des Fragebogens anzeigen (sonst ausblenden)

##### Filter SC05/F2

Wenn eine der folgenden Antwortoption(en) ausgewählt wurde: 2  
Dann Seite(n) **TA** des Fragebogens anzeigen (sonst ausblenden)

##### Filter SC05/F3

Wenn eine der folgenden Antwortoption(en) ausgewählt wurde: 3  
Dann Seite(n) **ME** des Fragebogens anzeigen (sonst ausblenden)

##### Filter SC05/F4

Wenn eine der folgenden Antwortoption(en) ausgewählt wurde: 4  
Dann Seite(n) **AU** des Fragebogens anzeigen (sonst ausblenden)

##### Filter SC05/F5

Wenn eine der folgenden Antwortoption(en) ausgewählt wurde: 5  
Dann Seite(n) **DE** des Fragebogens anzeigen (sonst ausblenden)

##### Filter SC05/F6

Wenn eine der folgenden Antwortoption(en) ausgewählt wurde: 6  
Dann Seite(n) **SP** des Fragebogens anzeigen (sonst ausblenden)

##### Filter SC05/F7

Wenn eine der folgenden Antwortoption(en) ausgewählt wurde: 7  
Dann Seite(n) **WA** des Fragebogens anzeigen (sonst ausblenden)

##### Filter SC05/F8

Wenn eine der folgenden Antwortoption(en) ausgewählt wurde: 8  
Dann Seite(n) **KA** des Fragebogens anzeigen (sonst ausblenden)

##### Filter SC05/F9

Wenn eine der folgenden Antwortoption(en) ausgewählt wurde: 9  
Dann Seite(n) **AK** des Fragebogens anzeigen (sonst ausblenden)

##### Filter SC05/F10

Wenn eine der folgenden Antwortoption(en) ausgewählt wurde: 10  
Dann Seite(n) **MA** des Fragebogens anzeigen (sonst ausblenden)

##### Filter SC05/F11

Wenn eine der folgenden Antwortoption(en) ausgewählt wurde: **11**  
Dann Seite(n) **AL** des Fragebogens anzeigen (sonst ausblenden)

**Filter SC05/F12**

Wenn eine der folgenden Antwortoption(en) ausgewählt wurde: **12**  
Dann Seite(n) **NA** des Fragebogens anzeigen (sonst ausblenden)

**Filter SC05/F13**

Wenn eine der folgenden Antwortoption(en) ausgewählt wurde: **13**  
Dann Seite(n) **ER** des Fragebogens anzeigen (sonst ausblenden)

**Filter SC05/F14**

Wenn eine der folgenden Antwortoption(en) ausgewählt wurde: **14**  
Dann Seite(n) **OL** des Fragebogens anzeigen (sonst ausblenden)

**Filter SC05/F15**

Wenn eine der folgenden Antwortoption(en) ausgewählt wurde: **15**  
Dann Seite(n) **CA** des Fragebogens anzeigen (sonst ausblenden)

**Filter SC05/F16**

Wenn eine der folgenden Antwortoption(en) ausgewählt wurde: **17**  
Dann Seite(n) **OS** des Fragebogens anzeigen (sonst ausblenden)

**Filter SC05/F17**

Wenn eine der folgenden Antwortoption(en) ausgewählt wurde: **18**  
Dann Seite(n) **TC** des Fragebogens anzeigen (sonst ausblenden)

35. Wie häufig betreiben Sie Yoga durchschnittlich?

YO01

- (mehrmals) täglich
  2-6 mal pro Woche
  einmal wöchentlich
  weniger als einmal wöchentlich

36. Wie ist/war die typische Schmerzstärke unter Yoga/Pilates?

YO10

|                                    |
|------------------------------------|
| 0 kein Schmerz                     |
| 1                                  |
| 2                                  |
| 3                                  |
| 4                                  |
| 5                                  |
| 6                                  |
| 7                                  |
| 8                                  |
| 9                                  |
| 10 stärkster vorstellbarer Schmerz |

37. Auf einer Skala von 0-10, wie effektiv würden Sie das Durchführen von Yoga oder Pilates für die Reduktion Ihrer endometriosebedingten Unterleibsschmerzen beurteilen?

YO02

|                            |
|----------------------------|
| 0 überhaupt nicht effektiv |
| 1                          |
| 2                          |
| 3                          |
| 4                          |
| 5                          |
| 6                          |
| 7                          |
| 8                          |
| 9                          |
| 10 sehr effektiv           |

YO03

**38. Welche und wie effektiv konnten Ihre endometriosebedingten Beschwerden oder Nebenwirkungen von Medikamenten, die Sie aufgrund ihrer Endometriose einnehmen, durch Yoga oder Pilates in ihrer Intensität oder Dauer reduziert werden?**

|                                               | starke Verbesserung (über 50%) | mäßige Verbesserung (25-50%) | geringe Verbesserung (unter 25%) | keine Verbesserung    | Verschlechterung der Beschwerden | Ich habe dieses Symptom nicht |
|-----------------------------------------------|--------------------------------|------------------------------|----------------------------------|-----------------------|----------------------------------|-------------------------------|
| Übelkeit/ Erbrechen                           | <input type="radio"/>          | <input type="radio"/>        | <input type="radio"/>            | <input type="radio"/> | <input type="radio"/>            | <input type="radio"/>         |
| Magen-/ Verdauungsbeschwerden                 | <input type="radio"/>          | <input type="radio"/>        | <input type="radio"/>            | <input type="radio"/> | <input type="radio"/>            | <input type="radio"/>         |
| Müdigkeit                                     | <input type="radio"/>          | <input type="radio"/>        | <input type="radio"/>            | <input type="radio"/> | <input type="radio"/>            | <input type="radio"/>         |
| Angstzustände                                 | <input type="radio"/>          | <input type="radio"/>        | <input type="radio"/>            | <input type="radio"/> | <input type="radio"/>            | <input type="radio"/>         |
| Depression/ gedrückte Stimmung                | <input type="radio"/>          | <input type="radio"/>        | <input type="radio"/>            | <input type="radio"/> | <input type="radio"/>            | <input type="radio"/>         |
| Schlaf                                        | <input type="radio"/>          | <input type="radio"/>        | <input type="radio"/>            | <input type="radio"/> | <input type="radio"/>            | <input type="radio"/>         |
| Regelschmerzen/ zyklische Unterbauchschmerzen | <input type="radio"/>          | <input type="radio"/>        | <input type="radio"/>            | <input type="radio"/> | <input type="radio"/>            | <input type="radio"/>         |
| azyklische Unterbauchschmerzen                | <input type="radio"/>          | <input type="radio"/>        | <input type="radio"/>            | <input type="radio"/> | <input type="radio"/>            | <input type="radio"/>         |
| Schmerzen beim Geschlechtsverkehr             | <input type="radio"/>          | <input type="radio"/>        | <input type="radio"/>            | <input type="radio"/> | <input type="radio"/>            | <input type="radio"/>         |
| Schmerzen beim Urin lassen                    | <input type="radio"/>          | <input type="radio"/>        | <input type="radio"/>            | <input type="radio"/> | <input type="radio"/>            | <input type="radio"/>         |
| Schmerzen beim Stuhlgang                      | <input type="radio"/>          | <input type="radio"/>        | <input type="radio"/>            | <input type="radio"/> | <input type="radio"/>            | <input type="radio"/>         |

**39. Haben Sie eine andere Wirkung von der Durchführung von Yoga oder Pilates erwartet?**

YO04

Ja

Nein

**1 aktive(r) Filter**

**Filter YO04/F1**

Wenn eine der folgenden Antwortoption(en) ausgewählt wurde: **1, 2**  
Dann Frage/Text **YO05** später im Fragebogen anzeigen (sonst ausblenden)

**40. Welche Erwartungen hatten Sie bezüglich der Durchführung von Yoga oder Pilates?**

YO05

**41. Konnte die Durchführung von Yoga oder Pilates die Menge an Medikamenten, die Sie für die Therapie Ihrer endometriosebedingten Symptome normalerweise benötigen reduzieren? (z.B. die Menge an Schmerzmittel)**

YO06

Ja, starke Reduktion (über 50%)

Ja, mäßige Reduktion (25-50%)

Ja, geringe Reduktion (unter 25%)

Nein

**42. Wie viel hat Sie durchschnittlich die Durchführung von Yoga oder Pilates monatlich gekostet?  
(z.B. monatliche Mitgliedsgebühr, Anfängerkurse)**

YO07

**43. Würden Sie Yoga/ Pilates einer Freundin oder einem Familienmitglied mit Endometriose weiterempfehlen?**

YO08

Ja

Nein

**44. Gibt es etwas weiteres, was Sie uns bezüglich Yoga/ Pilates mitteilen möchten?**

YO09

45. Wie häufig betreiben Sie Tai Chi/ Qi Gong durchschnittlich?

TA01

- (mehrmals) täglich
  2-6 mal pro Woche
  einmal wöchentlich
  weniger als einmal wöchentlich

46. Wie ist/war die typische Schmerzstärke unter Tai Chi/ Qi Gong?

TA11

|                                    |
|------------------------------------|
| 0 kein Schmerz                     |
| 1                                  |
| 2                                  |
| 3                                  |
| 4                                  |
| 5                                  |
| 6                                  |
| 7                                  |
| 8                                  |
| 9                                  |
| 10 stärkster vorstellbarer Schmerz |

47. Auf einer Skala von 0-10, wie effektiv würden Sie das Durchführen von Tai Chi/ Qi Gong für die Reduktion Ihrer endometriosebedingten Unterleibsschmerzen beurteilen?

TA10

|                            |
|----------------------------|
| 0 überhaupt nicht effektiv |
| 1                          |
| 2                          |
| 3                          |
| 4                          |
| 5                          |
| 6                          |
| 7                          |
| 8                          |
| 9                          |
| 10 sehr effektiv           |

TA03

**48. Welche und wie effektiv konnten Ihre endometriosebedingten Beschwerden oder Nebenwirkungen von Medikamenten, die Sie aufgrund ihrer Endometriose einnehmen, durch Tai Chi/ Qi Gong in ihrer Intensität oder Dauer reduziert werden?**

|                                               | starke Verbesserung (über 50%) | mäßige Verbesserung (25-50%) | geringe Verbesserung (unter 25%) | keine Verbesserung    | Verschlechterung der Beschwerden | Ich habe dieses Symptom nicht |
|-----------------------------------------------|--------------------------------|------------------------------|----------------------------------|-----------------------|----------------------------------|-------------------------------|
| Übelkeit/ Erbrechen                           | <input type="radio"/>          | <input type="radio"/>        | <input type="radio"/>            | <input type="radio"/> | <input type="radio"/>            | <input type="radio"/>         |
| Magen-/ Verdauungsbeschwerden                 | <input type="radio"/>          | <input type="radio"/>        | <input type="radio"/>            | <input type="radio"/> | <input type="radio"/>            | <input type="radio"/>         |
| Müdigkeit                                     | <input type="radio"/>          | <input type="radio"/>        | <input type="radio"/>            | <input type="radio"/> | <input type="radio"/>            | <input type="radio"/>         |
| Angstzustände                                 | <input type="radio"/>          | <input type="radio"/>        | <input type="radio"/>            | <input type="radio"/> | <input type="radio"/>            | <input type="radio"/>         |
| Depression/ gedrückte Stimmung                | <input type="radio"/>          | <input type="radio"/>        | <input type="radio"/>            | <input type="radio"/> | <input type="radio"/>            | <input type="radio"/>         |
| Schlaf                                        | <input type="radio"/>          | <input type="radio"/>        | <input type="radio"/>            | <input type="radio"/> | <input type="radio"/>            | <input type="radio"/>         |
| Regelschmerzen/ zyklische Unterbauchschmerzen | <input type="radio"/>          | <input type="radio"/>        | <input type="radio"/>            | <input type="radio"/> | <input type="radio"/>            | <input type="radio"/>         |
| azyklische Unterbauchschmerzen                | <input type="radio"/>          | <input type="radio"/>        | <input type="radio"/>            | <input type="radio"/> | <input type="radio"/>            | <input type="radio"/>         |
| Schmerzen beim Geschlechtsverkehr             | <input type="radio"/>          | <input type="radio"/>        | <input type="radio"/>            | <input type="radio"/> | <input type="radio"/>            | <input type="radio"/>         |
| Schmerzen beim Urin lassen                    | <input type="radio"/>          | <input type="radio"/>        | <input type="radio"/>            | <input type="radio"/> | <input type="radio"/>            | <input type="radio"/>         |
| Schmerzen beim Stuhlgang                      | <input type="radio"/>          | <input type="radio"/>        | <input type="radio"/>            | <input type="radio"/> | <input type="radio"/>            | <input type="radio"/>         |

**49. Haben Sie eine andere Wirkung von der Durchführung von Tai Chi/ Qi Gong erwartet?**

TA04

Ja

Nein

**1 aktive(r) Filter**

**Filter TA04/F1**

Wenn eine der folgenden Antwortoption(en) ausgewählt wurde: 1  
Dann Frage/Text **TA05** später im Fragebogen anzeigen (sonst ausblenden)

**50. Welche Erwartungen hatten Sie bezüglich der Durchführung von Tai Chi/ Qi Gong?**

TA05

**51. Konnte die Durchführung von Tai Chi/ Qi Gong die Menge an Medikamenten, die Sie für die Therapie Ihrer endometriosebedingten Symptome normalerweise benötigen reduzieren? (z.B. die Menge an Schmerzmittel)**

TA06

Ja, starke Reduktion (über 50%)

Ja, mäßige Reduktion (25-50%)

Ja, geringe Reduktion (unter 25%)

Nein

**52. Wie viel hat Sie durchschnittlich die Durchführung von Tai Chi/ Qi Gong monatlich gekostet?  
(z.B. monatliche Mitgliedsgebühr, Anfängerkurse)**

TA07

**53. Gibt es etwas weiteres, was Sie uns bezüglich Tai Chi/ Qi Gong mitteilen möchten?**

TA09

**54. Würden Sie Tai Chi/ Qi Gong einer Freundin oder einem Familienmitglied mit Endometriose weiterempfehlen?**

TA08

Ja

Nein

55. Wie häufig betreiben Sie Sport/ körperliche Aktivität durchschnittlich?

SP01

- (mehrmals) täglich
                 
  2-6 mal pro Woche
                 
  einmal wöchentlich
                 
  weniger als einmal wöchentlich

56. Wie ist/war die typische Schmerzstärke unter Sport/körperliche Aktivität?

SP11

|                                    |
|------------------------------------|
| 0 kein Schmerz                     |
| 1                                  |
| 2                                  |
| 3                                  |
| 4                                  |
| 5                                  |
| 6                                  |
| 7                                  |
| 8                                  |
| 9                                  |
| 10 stärkster vorstellbarer Schmerz |

57. Auf einer Skala von 0-10, wie effektiv würden Sie das Durchführen von Sport/ körperliche Aktivität für die Reduktion Ihrer endometriosebedingten Unterleibsschmerzen beurteilen?

SP10

|                            |
|----------------------------|
| 0 überhaupt nicht effektiv |
| 1                          |
| 2                          |
| 3                          |
| 4                          |
| 5                          |
| 6                          |
| 7                          |
| 8                          |
| 9                          |
| 10 sehr effektiv           |

SP03

**58. Welche und wie effektiv konnten Ihre endometriosebedingten Beschwerden oder Nebenwirkungen von Medikamenten, die Sie aufgrund ihrer Endometriose einnehmen durch Sport/ körperliche Aktivität in ihrer Intensität oder Dauer reduziert werden?**

|                                                     | starke<br>Verbesserung<br>(über 50%) | mäßige<br>Verbesserung<br>(25-50%) | geringe<br>Verbesserung<br>(unter 25%) | keine<br>Verbesserung | Verschlechterung<br>der Beschwerden | Ich habe dieses<br>Symptom nicht |
|-----------------------------------------------------|--------------------------------------|------------------------------------|----------------------------------------|-----------------------|-------------------------------------|----------------------------------|
| Übelkeit/ Erbrechen                                 | <input type="radio"/>                | <input type="radio"/>              | <input type="radio"/>                  | <input type="radio"/> | <input type="radio"/>               | <input type="radio"/>            |
| Magen-/<br>Verdauungsbeschwerden                    | <input type="radio"/>                | <input type="radio"/>              | <input type="radio"/>                  | <input type="radio"/> | <input type="radio"/>               | <input type="radio"/>            |
| Müdigkeit                                           | <input type="radio"/>                | <input type="radio"/>              | <input type="radio"/>                  | <input type="radio"/> | <input type="radio"/>               | <input type="radio"/>            |
| Angstzustände                                       | <input type="radio"/>                | <input type="radio"/>              | <input type="radio"/>                  | <input type="radio"/> | <input type="radio"/>               | <input type="radio"/>            |
| Depression/ gedrückte<br>Stimmung                   | <input type="radio"/>                | <input type="radio"/>              | <input type="radio"/>                  | <input type="radio"/> | <input type="radio"/>               | <input type="radio"/>            |
| Schlaf                                              | <input type="radio"/>                | <input type="radio"/>              | <input type="radio"/>                  | <input type="radio"/> | <input type="radio"/>               | <input type="radio"/>            |
| Regelschmerzen/<br>zyklische<br>Unterbauchschmerzen | <input type="radio"/>                | <input type="radio"/>              | <input type="radio"/>                  | <input type="radio"/> | <input type="radio"/>               | <input type="radio"/>            |
| azyklische<br>Unterbauchschmerzen                   | <input type="radio"/>                | <input type="radio"/>              | <input type="radio"/>                  | <input type="radio"/> | <input type="radio"/>               | <input type="radio"/>            |
| Schmerzen beim<br>Geschlechtsverkehr                | <input type="radio"/>                | <input type="radio"/>              | <input type="radio"/>                  | <input type="radio"/> | <input type="radio"/>               | <input type="radio"/>            |
| Schmerzen beim Urin<br>lassen                       | <input type="radio"/>                | <input type="radio"/>              | <input type="radio"/>                  | <input type="radio"/> | <input type="radio"/>               | <input type="radio"/>            |
| Schmerzen beim<br>Stuhlgang                         | <input type="radio"/>                | <input type="radio"/>              | <input type="radio"/>                  | <input type="radio"/> | <input type="radio"/>               | <input type="radio"/>            |

**59. Haben Sie eine andere Wirkung von der Durchführung von Sport/ körperlicher Aktivität erwartet?**

**SP04**

Ja

Nein

**1 aktive(r) Filter**

**Filter SP04/F1**

Wenn eine der folgenden Antwortoption(en) ausgewählt wurde: **1**  
Dann Frage/Text **SP05** später im Fragebogen anzeigen (sonst ausblenden)

**60. Welche Erwartungen hatten Sie bezüglich der Durchführung von Sport/ körperlicher Aktivität?**

**SP05**

**SP06**

**61. Konnte die Durchführung von Sport/ körperlicher Aktivität die Menge an Medikamenten, die Sie für die Therapie Ihrer endometriosebedingten Symptome normalerweise benötigen reduzieren? (z.B. die Menge an Schmerzmittel)**

Ja, starke Reduktion (über 50%)

Ja, mäßige Reduktion (25-50%)

Ja, geringe Reduktion (unter 25%)

Nein

**62. Wie viel hat Sie durchschnittlich die Durchführung von Sport/ körperlicher Aktivität monatlich gekostet? (z.B. monatliche Mitgliedsgebühr, Anfängerkurse)**

SP07

**63. Würden Sie Sport/ körperliche Aktivität einer Freundin oder einem Familienmitglied mit Endometriose weiterempfehlen?**

SP08

Ja

Nein

**64. Gibt es etwas weiteres, was Sie uns bezüglich Sport/ körperliche Aktivität mitteilen möchten?**

SP09

65. Wie häufig betreiben Sie Meditation/ Atemübungen durchschnittlich?

ME01

- (mehrmals) täglich       2-6 mal pro Woche       einmal wöchentlich       weniger als einmal wöchentlich

66. Wie ist/war die typische Schmerzstärke unter Meditation/Atemübungen?

ME11

|                                    |
|------------------------------------|
| 0 kein Schmerz                     |
| 1                                  |
| 2                                  |
| 3                                  |
| 4                                  |
| 5                                  |
| 6                                  |
| 7                                  |
| 8                                  |
| 9                                  |
| 10 stärkster vorstellbarer Schmerz |

67. Auf einer Skala von 0-10, wie effektiv würden Sie das Durchführen von Meditation/ Atemübungen für die Reduktion Ihrer endometriosebedingten Unterleibsschmerzen beurteilen?

ME10

|                            |
|----------------------------|
| 0 überhaupt nicht effektiv |
| 1                          |
| 2                          |
| 3                          |
| 4                          |
| 5                          |
| 6                          |
| 7                          |
| 8                          |
| 9                          |
| 10 sehr effektiv           |

ME03

**68. Welche und wie effektiv konnten Ihre endometriosebedingten Beschwerden oder Nebenwirkungen von Medikamenten, die Sie aufgrund ihrer Endometriose einnehmen, durch Meditation/ Atemübungen in ihrer Intensität oder Dauerreduziert werden?**

|                                                     | starke<br>Verbesserung<br>(über 50%) | mäßige<br>Verbesserung<br>(25-50%) | geringe<br>Verbesserung<br>(unter 25%) | keine<br>Verbesserung | Verschlechterung<br>der Beschwerden | Ich habe dieses<br>Symptom nicht |
|-----------------------------------------------------|--------------------------------------|------------------------------------|----------------------------------------|-----------------------|-------------------------------------|----------------------------------|
| Übelkeit/ Erbrechen                                 | <input type="radio"/>                | <input type="radio"/>              | <input type="radio"/>                  | <input type="radio"/> | <input type="radio"/>               | <input type="radio"/>            |
| Magen-/<br>Verdauungsbeschwerden                    | <input type="radio"/>                | <input type="radio"/>              | <input type="radio"/>                  | <input type="radio"/> | <input type="radio"/>               | <input type="radio"/>            |
| Müdigkeit                                           | <input type="radio"/>                | <input type="radio"/>              | <input type="radio"/>                  | <input type="radio"/> | <input type="radio"/>               | <input type="radio"/>            |
| Angstzustände                                       | <input type="radio"/>                | <input type="radio"/>              | <input type="radio"/>                  | <input type="radio"/> | <input type="radio"/>               | <input type="radio"/>            |
| Depression/ gedrückte<br>Stimmung                   | <input type="radio"/>                | <input type="radio"/>              | <input type="radio"/>                  | <input type="radio"/> | <input type="radio"/>               | <input type="radio"/>            |
| Schlaf                                              | <input type="radio"/>                | <input type="radio"/>              | <input type="radio"/>                  | <input type="radio"/> | <input type="radio"/>               | <input type="radio"/>            |
| Regelschmerzen/<br>zyklische<br>Unterbauchschmerzen | <input type="radio"/>                | <input type="radio"/>              | <input type="radio"/>                  | <input type="radio"/> | <input type="radio"/>               | <input type="radio"/>            |
| azyklische<br>Unterbauchschmerzen                   | <input type="radio"/>                | <input type="radio"/>              | <input type="radio"/>                  | <input type="radio"/> | <input type="radio"/>               | <input type="radio"/>            |
| Schmerzen beim<br>Geschlechtsverkehr                | <input type="radio"/>                | <input type="radio"/>              | <input type="radio"/>                  | <input type="radio"/> | <input type="radio"/>               | <input type="radio"/>            |
| Schmerzen beim Urin<br>lassen                       | <input type="radio"/>                | <input type="radio"/>              | <input type="radio"/>                  | <input type="radio"/> | <input type="radio"/>               | <input type="radio"/>            |
| Schmerzen beim<br>Stuhlgang                         | <input type="radio"/>                | <input type="radio"/>              | <input type="radio"/>                  | <input type="radio"/> | <input type="radio"/>               | <input type="radio"/>            |

**69. Haben Sie eine andere Wirkung von der Durchführung von Meditation/ Atemübungen erwartet?**

**ME04**

Ja

Nein

**1 aktive(r) Filter**

**Filter ME04/F1**

Wenn eine der folgenden Antwortoption(en) ausgewählt wurde: **1**

Dann Frage/Text **ME05** später im Fragebogen anzeigen (sonst ausblenden)

**70. Welche Erwartungen hatten Sie bezüglich der Durchführung von Meditation/ Atemübungen?**

**ME05**

**ME06**

**71. Konnte die Durchführung von Meditation/ Atemübungen die Menge an Medikamenten, die Sie für die Therapie Ihrer endometriosebedingten Symptome normalerweise benötigen reduzieren? (z.B. die Menge an Schmerzmittel)**

- Ja, starke Reduktion (über 50%)       Ja, mäßige Reduktion (25-50%)       Ja, geringe Reduktion (unter 25%)       Nein

**72. Wie viel hat Sie durchschnittlich die Durchführung von Meditation/ Atemübungen monatlich gekostet? (z.B. monatliche Mitgliedsgebühr, Anfängerkurse)**

ME07

**73. Würden Sie Meditation/ Atemübungen einer Freundin oder einem Familienmitglied mit Endometriose weiterempfehlen?**

ME08

- Ja       Nein

**74. Gibt es etwas weiteres, was Sie uns bezüglich Meditation/ Atemübungen mitteilen möchten?**

ME09

75. Wie häufig haben Sie sich aufgrund Ihrer Endometriose durchschnittlich ausgeruht?

AU01

- (mehrmals) täglich
  2-6 mal pro Woche
  einmal wöchentlich
  weniger als einmal wöchentlich

76. Wie ist/war die typische Schmerzstärke unter Ausruhen/Entspannen?

AU11

|                                    |
|------------------------------------|
| 0 kein Schmerz                     |
| 1                                  |
| 2                                  |
| 3                                  |
| 4                                  |
| 5                                  |
| 6                                  |
| 7                                  |
| 8                                  |
| 9                                  |
| 10 stärkster vorstellbarer Schmerz |

77. Auf einer Skala von 0-10, wie effektiv würden Sie das Ausruhen/Entspannen für die Reduktion Ihrer endometriosebedingten Unterleibsschmerzen beurteilen?

AU10

|                            |
|----------------------------|
| 0 überhaupt nicht effektiv |
| 1                          |
| 2                          |
| 3                          |
| 4                          |
| 5                          |
| 6                          |
| 7                          |
| 8                          |
| 9                          |
| 10 sehr effektiv           |

AU03

**78. Welche und wie effektiv konnten Ihre endometriosebedingten Beschwerden oder Nebenwirkungen von Medikamenten, die Sie aufgrund ihrer Endometriose einnehmen, durch Ausruhen/Entspannen in ihrer Intensität oder Dauer reduziert werden?**

|                                               | starke Verbesserung (über 50%) | mäßige Verbesserung (25-50%) | geringe Verbesserung (unter 25%) | keine Verbesserung    | Verschlechterung der Beschwerden | Ich habe dieses Symptom nicht |
|-----------------------------------------------|--------------------------------|------------------------------|----------------------------------|-----------------------|----------------------------------|-------------------------------|
| Übelkeit/ Erbrechen                           | <input type="radio"/>          | <input type="radio"/>        | <input type="radio"/>            | <input type="radio"/> | <input type="radio"/>            | <input type="radio"/>         |
| Magen-/ Verdauungsbeschwerden                 | <input type="radio"/>          | <input type="radio"/>        | <input type="radio"/>            | <input type="radio"/> | <input type="radio"/>            | <input type="radio"/>         |
| Müdigkeit                                     | <input type="radio"/>          | <input type="radio"/>        | <input type="radio"/>            | <input type="radio"/> | <input type="radio"/>            | <input type="radio"/>         |
| Angstzustände                                 | <input type="radio"/>          | <input type="radio"/>        | <input type="radio"/>            | <input type="radio"/> | <input type="radio"/>            | <input type="radio"/>         |
| Depression/ gedrückte Stimmung                | <input type="radio"/>          | <input type="radio"/>        | <input type="radio"/>            | <input type="radio"/> | <input type="radio"/>            | <input type="radio"/>         |
| Schlaf                                        | <input type="radio"/>          | <input type="radio"/>        | <input type="radio"/>            | <input type="radio"/> | <input type="radio"/>            | <input type="radio"/>         |
| Regelschmerzen/ zyklische Unterbauchschmerzen | <input type="radio"/>          | <input type="radio"/>        | <input type="radio"/>            | <input type="radio"/> | <input type="radio"/>            | <input type="radio"/>         |
| azyklische Unterbauchschmerzen                | <input type="radio"/>          | <input type="radio"/>        | <input type="radio"/>            | <input type="radio"/> | <input type="radio"/>            | <input type="radio"/>         |
| Schmerzen beim Geschlechtsverkehr             | <input type="radio"/>          | <input type="radio"/>        | <input type="radio"/>            | <input type="radio"/> | <input type="radio"/>            | <input type="radio"/>         |
| Schmerzen beim Urin lassen                    | <input type="radio"/>          | <input type="radio"/>        | <input type="radio"/>            | <input type="radio"/> | <input type="radio"/>            | <input type="radio"/>         |
| Schmerzen beim Stuhlgang                      | <input type="radio"/>          | <input type="radio"/>        | <input type="radio"/>            | <input type="radio"/> | <input type="radio"/>            | <input type="radio"/>         |

**79. Haben Sie eine andere Wirkung von dem Ausruhen/Entspannen erwartet?**

**AU04**

Ja

Nein

**1 aktive(r) Filter**

**Filter AU04/F1**

Wenn eine der folgenden Antwortoption(en) ausgewählt wurde: 1  
Dann Frage/Text **AU05** später im Fragebogen anzeigen (sonst ausblenden)

**80. Welche Erwartungen hatten Sie bezüglich des Ausruhens/Entspannen?**

**AU05**

**81. Konnte das Ausruhen/Entspannen die Menge an Medikamenten, die Sie für die Therapie Ihrer endometriosebedingten Symptome normalerweise benötigen reduzieren? (z.B. die Menge an Schmerzmittel)**

**AU06**

Ja, starke Reduktion (über 50%)

Ja, mäßige Reduktion (25-50%)

Ja, geringe Reduktion (unter 25%)

Nein

**82. Wie viel hat Sie durchschnittlich das Ausruhen/Entspannen monatlich gekostet?**

AU07

**83. Würden Sie das Ausruhen/Entspannen einer Freundin oder einem Familienmitglied mit Endometriose weiterempfehlen?**

AU08

Ja

Nein

**84. Gibt es etwas weiteres, was Sie uns bezüglich des Ausruhens/Entspannens mitteilen möchten?**

AU09

85. Wie häufig führen Sie durchschnittlich Dehnungsübungen durch?

DE01

- (mehrmals) täglich       2-6 mal pro Woche       einmal wöchentlich       weniger als einmal wöchentlich

86. Wie ist/war die typische Schmerzstärke unter Dehnungsübungen?

DE11

|                                    |
|------------------------------------|
| 0 kein Schmerz                     |
| 1                                  |
| 2                                  |
| 3                                  |
| 4                                  |
| 5                                  |
| 6                                  |
| 7                                  |
| 8                                  |
| 9                                  |
| 10 stärkster vorstellbarer Schmerz |

87. Auf einer Skala von 0-10, wie effektiv würden Sie das Durchführen von Dehnungsübungen für die Reduktion Ihrer endometriosebedingten Unterleibsschmerzen beurteilen?

DE10

|                            |
|----------------------------|
| 0 überhaupt nicht effektiv |
| 1                          |
| 2                          |
| 3                          |
| 4                          |
| 5                          |
| 6                          |
| 7                          |
| 8                          |
| 9                          |
| 10 sehr effektiv           |

DE03

**88. Welche und wie effektiv konnten Ihre endometriosebedingten Beschwerden oder Nebenwirkungen von Medikamenten, die Sie aufgrund ihrer Endometriose einnehmen durch Dehnungsübungen in ihrer Intensität oder Dauer reduziert werden?**

|                                               | starke Verbesserung (über 50%) | mäßige Verbesserung (25-50%) | geringe Verbesserung (unter 25%) | keine Verbesserung    | Verschlechterung der Beschwerden | Ich habe dieses Symptom nicht |
|-----------------------------------------------|--------------------------------|------------------------------|----------------------------------|-----------------------|----------------------------------|-------------------------------|
| Übelkeit/ Erbrechen                           | <input type="radio"/>          | <input type="radio"/>        | <input type="radio"/>            | <input type="radio"/> | <input type="radio"/>            | <input type="radio"/>         |
| Magen-/ Verdauungsbeschwerden                 | <input type="radio"/>          | <input type="radio"/>        | <input type="radio"/>            | <input type="radio"/> | <input type="radio"/>            | <input type="radio"/>         |
| Müdigkeit                                     | <input type="radio"/>          | <input type="radio"/>        | <input type="radio"/>            | <input type="radio"/> | <input type="radio"/>            | <input type="radio"/>         |
| Angstzustände                                 | <input type="radio"/>          | <input type="radio"/>        | <input type="radio"/>            | <input type="radio"/> | <input type="radio"/>            | <input type="radio"/>         |
| Depression/ gedrückte Stimmung                | <input type="radio"/>          | <input type="radio"/>        | <input type="radio"/>            | <input type="radio"/> | <input type="radio"/>            | <input type="radio"/>         |
| Schlaf                                        | <input type="radio"/>          | <input type="radio"/>        | <input type="radio"/>            | <input type="radio"/> | <input type="radio"/>            | <input type="radio"/>         |
| Regelschmerzen/ zyklische Unterbauchschmerzen | <input type="radio"/>          | <input type="radio"/>        | <input type="radio"/>            | <input type="radio"/> | <input type="radio"/>            | <input type="radio"/>         |
| azyklische Unterbauchschmerzen                | <input type="radio"/>          | <input type="radio"/>        | <input type="radio"/>            | <input type="radio"/> | <input type="radio"/>            | <input type="radio"/>         |
| Schmerzen beim Geschlechtsverkehr             | <input type="radio"/>          | <input type="radio"/>        | <input type="radio"/>            | <input type="radio"/> | <input type="radio"/>            | <input type="radio"/>         |
| Schmerzen beim Urin lassen                    | <input type="radio"/>          | <input type="radio"/>        | <input type="radio"/>            | <input type="radio"/> | <input type="radio"/>            | <input type="radio"/>         |
| Schmerzen beim Stuhlgang                      | <input type="radio"/>          | <input type="radio"/>        | <input type="radio"/>            | <input type="radio"/> | <input type="radio"/>            | <input type="radio"/>         |

**89. Haben Sie eine andere Wirkung von der Durchführung von Dehnungsübungen erwartet?**

DE04

Ja

Nein

**1 aktive(r) Filter**

**Filter DE04/F1**

Wenn eine der folgenden Antwortoption(en) ausgewählt wurde: 1  
Dann Frage/Text **DE05** später im Fragebogen anzeigen (sonst ausblenden)

**90. Welche Erwartungen hatten Sie bezüglich der Durchführung von Dehnungsübungen?**

DE05

**91. Konnte die Durchführung von Dehnungsübungen die Menge an Medikamenten, die Sie für die Therapie Ihrer endometriosebedingten Symptome normalerweise benötigen reduzieren? (z.B. die Menge an Schmerzmittel)**

DE06

Ja, starke Reduktion (über 50%)

Ja, mäßige Reduktion (25-50%)

Ja, geringe Reduktion (unter 25%)

Nein

**92. Wie viel hat Sie durchschnittlich die Durchführung von Dehnungsübungen monatlich gekostet? (z.B. monatliche Mitgliedsgebühr, Anfängerkurse)**

DE07

**93. Würden Sie Dehnungsübungen einer Freundin oder einem Familienmitglied mit Endometriose weiterempfehlen?**

DE08

Ja

Nein

**94. Gibt es etwas weiteres, was Sie uns bezüglich Dehnungsübungen mitteilen möchten?**

DE09

95. Wie häufig führen Sie Wärmeanwendungen durchschnittlich durch?

WA01

- (mehrmals) täglich
  2-6 mal pro Woche
  einmal wöchentlich
  weniger als einmal wöchentlich

96. Wie ist/war die typische Schmerzstärke unter Wärmeanwendungen?

WA11

|                                    |
|------------------------------------|
| 0 kein Schmerz                     |
| 1                                  |
| 2                                  |
| 3                                  |
| 4                                  |
| 5                                  |
| 6                                  |
| 7                                  |
| 8                                  |
| 9                                  |
| 10 stärkster vorstellbarer Schmerz |

97. Auf einer Skala von 0-10, wie effektiv würden Sie das Durchführen von Wärmeanwendungen für die Reduktion Ihrer endometriosebedingten Unterleibsschmerzen beurteilen?

WA10

|                            |
|----------------------------|
| 0 überhaupt nicht effektiv |
| 1                          |
| 2                          |
| 3                          |
| 4                          |
| 5                          |
| 6                          |
| 7                          |
| 8                          |
| 9                          |
| 10 sehr effektiv           |

WA03

**98. Welche und wie effektiv konnten Ihre endometriosebedingten Beschwerden oder Nebenwirkungen von Medikamenten, die Sie aufgrund ihrer Endometriose einnehmen, durch Wärmeanwendungen in ihrer Intensität oder Dauer reduziert werden?**

|                                                     | starke<br>Verbesserung<br>(über 50%) | mäßige<br>Verbesserung<br>(25-50%) | geringe<br>Verbesserung<br>(unter 25%) | keine<br>Verbesserung | Verschlechterung<br>der Beschwerden | Ich habe dieses<br>Symptom nicht |
|-----------------------------------------------------|--------------------------------------|------------------------------------|----------------------------------------|-----------------------|-------------------------------------|----------------------------------|
| Übelkeit/ Erbrechen                                 | <input type="radio"/>                | <input type="radio"/>              | <input type="radio"/>                  | <input type="radio"/> | <input type="radio"/>               | <input type="radio"/>            |
| Magen-/<br>Verdauungsbeschwerden                    | <input type="radio"/>                | <input type="radio"/>              | <input type="radio"/>                  | <input type="radio"/> | <input type="radio"/>               | <input type="radio"/>            |
| Müdigkeit                                           | <input type="radio"/>                | <input type="radio"/>              | <input type="radio"/>                  | <input type="radio"/> | <input type="radio"/>               | <input type="radio"/>            |
| Angstzustände                                       | <input type="radio"/>                | <input type="radio"/>              | <input type="radio"/>                  | <input type="radio"/> | <input type="radio"/>               | <input type="radio"/>            |
| Depression/ gedrückte<br>Stimmung                   | <input type="radio"/>                | <input type="radio"/>              | <input type="radio"/>                  | <input type="radio"/> | <input type="radio"/>               | <input type="radio"/>            |
| Schlaf                                              | <input type="radio"/>                | <input type="radio"/>              | <input type="radio"/>                  | <input type="radio"/> | <input type="radio"/>               | <input type="radio"/>            |
| Regelschmerzen/<br>zyklische<br>Unterbauchschmerzen | <input type="radio"/>                | <input type="radio"/>              | <input type="radio"/>                  | <input type="radio"/> | <input type="radio"/>               | <input type="radio"/>            |
| azyklische<br>Unterbauchschmerzen                   | <input type="radio"/>                | <input type="radio"/>              | <input type="radio"/>                  | <input type="radio"/> | <input type="radio"/>               | <input type="radio"/>            |
| Schmerzen beim<br>Geschlechtsverkehr                | <input type="radio"/>                | <input type="radio"/>              | <input type="radio"/>                  | <input type="radio"/> | <input type="radio"/>               | <input type="radio"/>            |
| Schmerzen beim Urin<br>lassen                       | <input type="radio"/>                | <input type="radio"/>              | <input type="radio"/>                  | <input type="radio"/> | <input type="radio"/>               | <input type="radio"/>            |
| Schmerzen beim<br>Stuhlgang                         | <input type="radio"/>                | <input type="radio"/>              | <input type="radio"/>                  | <input type="radio"/> | <input type="radio"/>               | <input type="radio"/>            |

**99. Haben Sie eine andere Wirkung von der Durchführung von Wärmeanwendungen erwartet?**

**WA04**

Ja

Nein

**1 aktive(r) Filter**

**Filter WA04/F1**

Wenn eine der folgenden Antwortoption(en) ausgewählt wurde: **1**  
Dann Frage/Text **WA05** später im Fragebogen anzeigen (sonst ausblenden)

**100. Welche Erwartungen hatten Sie bezüglich der Durchführung von Wärmeanwendungen?**

**WA05**

**WA06**

**101. Konnte die Durchführung von Wärmeanwendungen die Menge an Medikamenten, die Sie für die Therapie Ihrer endometriosebedingten Symptome normalerweise benötigen reduzieren? (z.B. die Menge an Schmerzmittel)**

Ja, starke Reduktion (über 50%)

Ja, mäßige Reduktion (25-50%)

Ja, geringe Reduktion (unter 25%)

Nein

**102. Wie viel hat Sie durchschnittlich die Durchführung von Wärmeanwendungen monatlich gekostet?**

WA07

**103. Würden Sie die Anwendung von Wärme einer Freundin oder einem Familienmitglied mit Endometriose weiterempfehlen?**

WA08

Ja

Nein

**104. Gibt es etwas weiteres, was Sie uns bezüglich der Anwendung von Wärme mitteilen möchten?**

WA09

105. Wie häufig führen Sie Kälteanwendungen durchschnittlich durch?

KA01

- (mehrmals) täglich
  2-6 mal pro Woche
  einmal wöchentlich
  weniger als einmal wöchentlich

106. Wie ist/war die typische Schmerzstärke unter Kälteanwendungen?

KA11

|                                    |
|------------------------------------|
| 0 kein Schmerz                     |
| 1                                  |
| 2                                  |
| 3                                  |
| 4                                  |
| 5                                  |
| 6                                  |
| 7                                  |
| 8                                  |
| 9                                  |
| 10 stärkster vorstellbarer Schmerz |

107. Auf einer Skala von 0-10, wie effektiv würden Sie das Durchführen von Kälteanwendungen für die Reduktion Ihrer endometriosebedingten Unterleibsschmerzen beurteilen?

KA10

|                            |
|----------------------------|
| 0 überhaupt nicht effektiv |
| 1                          |
| 2                          |
| 3                          |
| 4                          |
| 5                          |
| 6                          |
| 7                          |
| 8                          |
| 9                          |
| 10 sehr effektiv           |

KA03

**108. Welche und wie effektiv konnten Ihre endometriosebedingten Beschwerden oder Nebenwirkungen von Medikamenten, die Sie aufgrund ihrer Endometriose einnehmen durch Yoga oder Pilates in ihrer Intensität oder Dauer reduziert werden?**

|                                                     | starke<br>Verbesserung<br>(über 50%) | mäßige<br>Verbesserung<br>(25-50%) | geringe<br>Verbesserung<br>(unter 25%) | keine<br>Verbesserung | Verschlechterung<br>der Beschwerden | Ich habe dieses<br>Symptom nicht |
|-----------------------------------------------------|--------------------------------------|------------------------------------|----------------------------------------|-----------------------|-------------------------------------|----------------------------------|
| Übelkeit/ Erbrechen                                 | <input type="radio"/>                | <input type="radio"/>              | <input type="radio"/>                  | <input type="radio"/> | <input type="radio"/>               | <input type="radio"/>            |
| Magen-/<br>Verdauungsbeschwerden                    | <input type="radio"/>                | <input type="radio"/>              | <input type="radio"/>                  | <input type="radio"/> | <input type="radio"/>               | <input type="radio"/>            |
| Müdigkeit                                           | <input type="radio"/>                | <input type="radio"/>              | <input type="radio"/>                  | <input type="radio"/> | <input type="radio"/>               | <input type="radio"/>            |
| Angstzustände                                       | <input type="radio"/>                | <input type="radio"/>              | <input type="radio"/>                  | <input type="radio"/> | <input type="radio"/>               | <input type="radio"/>            |
| Depression/ gedrückte<br>Stimmung                   | <input type="radio"/>                | <input type="radio"/>              | <input type="radio"/>                  | <input type="radio"/> | <input type="radio"/>               | <input type="radio"/>            |
| Schlaf                                              | <input type="radio"/>                | <input type="radio"/>              | <input type="radio"/>                  | <input type="radio"/> | <input type="radio"/>               | <input type="radio"/>            |
| Regelschmerzen/<br>zyklische<br>Unterbauchschmerzen | <input type="radio"/>                | <input type="radio"/>              | <input type="radio"/>                  | <input type="radio"/> | <input type="radio"/>               | <input type="radio"/>            |
| azyklische<br>Unterbauchschmerzen                   | <input type="radio"/>                | <input type="radio"/>              | <input type="radio"/>                  | <input type="radio"/> | <input type="radio"/>               | <input type="radio"/>            |
| Schmerzen beim<br>Geschlechtsverkehr                | <input type="radio"/>                | <input type="radio"/>              | <input type="radio"/>                  | <input type="radio"/> | <input type="radio"/>               | <input type="radio"/>            |
| Schmerzen beim Urin<br>lassen                       | <input type="radio"/>                | <input type="radio"/>              | <input type="radio"/>                  | <input type="radio"/> | <input type="radio"/>               | <input type="radio"/>            |
| Schmerzen beim<br>Stuhlgang                         | <input type="radio"/>                | <input type="radio"/>              | <input type="radio"/>                  | <input type="radio"/> | <input type="radio"/>               | <input type="radio"/>            |

**109. Haben Sie eine andere Wirkung von der Durchführung von Kälteanwendungen erwartet?**

**KA04**

Ja

Nein

**1 aktive(r) Filter**

**Filter KA04/F1**

Wenn eine der folgenden Antwortoption(en) ausgewählt wurde: **1**  
Dann Frage/Text **KA05** später im Fragebogen anzeigen (sonst ausblenden)

**110. Welche Erwartungen hatten Sie bezüglich der Durchführung von Kälteanwendungen?**

**KA05**

**KA06**

**111. Konnte die Durchführung von Kälteanwendungen die Menge an Medikamenten, die Sie für die Therapie Ihrer endometriosebedingten Symptome normalerweise benötigen reduzieren? (z.B. die Menge an Schmerzmittel)**

Ja, starke Reduktion (über 50%)

Ja, mäßige Reduktion (25-50%)

Ja, geringe Reduktion (unter 25%)

Nein

**112. Wie viel hat Sie durchschnittlich die Durchführung von Kälteanwendungen monatlich gekostet?**

KA07

**113. Würden Sie die Anwendung von Kälte einer Freundin oder einem Familienmitglied mit Endometriose weiterempfehlen?**

KA08

Ja

Nein

**114. Gibt es etwas weiteres, was Sie uns bezüglich der Anwendung von Kälte mitteilen möchten?**

KA09

115. Wie häufig führen Sie Akupunktur durchschnittlich durch?

AK01

- (mehrmals) täglich       2-6 mal pro Woche       einmal wöchentlich       weniger als einmal wöchentlich

116. Wie ist/war die typische Schmerzstärke unter Akupunktur?

AK11

|                                    |
|------------------------------------|
| 0 kein Schmerz                     |
| 1                                  |
| 2                                  |
| 3                                  |
| 4                                  |
| 5                                  |
| 6                                  |
| 7                                  |
| 8                                  |
| 9                                  |
| 10 stärkster vorstellbarer Schmerz |

117. Auf einer Skala von 0-10, wie effektiv würden Sie das Durchführen von Akupunktur für die Reduktion ~~von~~ <sup>unter</sup> endometriosebedingten Unterleibsschmerzen beurteilen?

AK10

|                            |
|----------------------------|
| 0 überhaupt nicht effektiv |
| 1                          |
| 2                          |
| 3                          |
| 4                          |
| 5                          |
| 6                          |
| 7                          |
| 8                          |
| 9                          |
| 10 sehr effektiv           |

AK03

**118. Welche und wie effektiv konnten Ihre endometriosebedingten Beschwerden oder Nebenwirkungen von Medikamenten, die Sie aufgrund ihrer Endometriose einnehmen, durch Akupunktur in ihrer Intensität oder Dauer reduziert werden?**

|                                               | starke Verbesserung (über 50%) | mäßige Verbesserung (25-50%) | geringe Verbesserung (unter 25%) | keine Verbesserung    | Verschlechterung der Beschwerden | Ich habe dieses Symptom nicht |
|-----------------------------------------------|--------------------------------|------------------------------|----------------------------------|-----------------------|----------------------------------|-------------------------------|
| Übelkeit/ Erbrechen                           | <input type="radio"/>          | <input type="radio"/>        | <input type="radio"/>            | <input type="radio"/> | <input type="radio"/>            | <input type="radio"/>         |
| Magen-/ Verdauungsbeschwerden                 | <input type="radio"/>          | <input type="radio"/>        | <input type="radio"/>            | <input type="radio"/> | <input type="radio"/>            | <input type="radio"/>         |
| Müdigkeit                                     | <input type="radio"/>          | <input type="radio"/>        | <input type="radio"/>            | <input type="radio"/> | <input type="radio"/>            | <input type="radio"/>         |
| Angstzustände                                 | <input type="radio"/>          | <input type="radio"/>        | <input type="radio"/>            | <input type="radio"/> | <input type="radio"/>            | <input type="radio"/>         |
| Depression/ gedrückte Stimmung                | <input type="radio"/>          | <input type="radio"/>        | <input type="radio"/>            | <input type="radio"/> | <input type="radio"/>            | <input type="radio"/>         |
| Schlaf                                        | <input type="radio"/>          | <input type="radio"/>        | <input type="radio"/>            | <input type="radio"/> | <input type="radio"/>            | <input type="radio"/>         |
| Regelschmerzen/ zyklische Unterbauchschmerzen | <input type="radio"/>          | <input type="radio"/>        | <input type="radio"/>            | <input type="radio"/> | <input type="radio"/>            | <input type="radio"/>         |
| azyklische Unterbauchschmerzen                | <input type="radio"/>          | <input type="radio"/>        | <input type="radio"/>            | <input type="radio"/> | <input type="radio"/>            | <input type="radio"/>         |
| Schmerzen beim Geschlechtsverkehr             | <input type="radio"/>          | <input type="radio"/>        | <input type="radio"/>            | <input type="radio"/> | <input type="radio"/>            | <input type="radio"/>         |
| Schmerzen beim Urin lassen                    | <input type="radio"/>          | <input type="radio"/>        | <input type="radio"/>            | <input type="radio"/> | <input type="radio"/>            | <input type="radio"/>         |
| Schmerzen beim Stuhlgang                      | <input type="radio"/>          | <input type="radio"/>        | <input type="radio"/>            | <input type="radio"/> | <input type="radio"/>            | <input type="radio"/>         |

**119. Haben Sie eine andere Wirkung von der Durchführung von Akupunktur erwartet?**

**AK04**

Ja

Nein

**1 aktive(r) Filter**

**Filter AK04/F1**

Wenn eine der folgenden Antwortoption(en) ausgewählt wurde: 1  
Dann Frage/Text **AK05** später im Fragebogen anzeigen (sonst ausblenden)

**120. Welche Erwartungen hatten Sie bezüglich der Durchführung von Akupunktur?**

**AK05**

**121. Konnte die Durchführung von Akupunktur die Menge an Medikamenten, die Sie für die Therapie Ihrer endometriosebedingten Symptome normalerweise benötigen reduzieren? (z.B. die Menge an Schmerzmittel)**

**AK06**

Ja, starke Reduktion (über 50%)

Ja, mäßige Reduktion (25-50%)

Ja, geringe Reduktion (unter 25%)

Nein

**122. Wie viel hat Sie durchschnittlich die Durchführung von Akupunktur monatlich gekostet?**

AK07

**123. Würden Sie Akupunktur einer Freundin oder einem Familienmitglied mit Endometriose weiterempfehlen?**

AK08

Ja

Nein

**124. Gibt es etwas weiteres, was Sie uns bezüglich Akupunktur mitteilen möchten?**

AK09

125. Wie häufig nutzen Sie Massagebehandlungen durchschnittlich?

MA01

(mehrmals) täglich

2-6 mal pro Woche

einmal wöchentlich

weniger als einmal wöchentlich

126. Wie ist/war die typische Schmerzstärke unter Massage?

MA11

|                                    |
|------------------------------------|
| 0 kein Schmerz                     |
| 1                                  |
| 2                                  |
| 3                                  |
| 4                                  |
| 5                                  |
| 6                                  |
| 7                                  |
| 8                                  |
| 9                                  |
| 10 stärkster vorstellbarer Schmerz |

127. Auf einer Skala von 0-10, wie effektiv würden Sie Massagen für die Reduktion Ihrer endometriosebedingten Unterleibsschmerzen beurteilen?

MA10

|                            |
|----------------------------|
| 0 überhaupt nicht effektiv |
| 1                          |
| 2                          |
| 3                          |
| 4                          |
| 5                          |
| 6                          |
| 7                          |
| 8                          |
| 9                          |
| 10 sehr effektiv           |

MA03

**128. Welche und wie effektiv konnten Ihre endometriosebedingten Beschwerden oder Nebenwirkungen von Medikamenten, die Sie aufgrund ihrer Endometriose einnehmen, durch Massagen in ihrer Intensität oder Dauer reduziert werden?**

|                                               | starke Verbesserung (über 50%) | mäßige Verbesserung (25-50%) | geringe Verbesserung (unter 25%) | keine Verbesserung    | Verschlechterung der Beschwerden | Ich habe dieses Symptom nicht |
|-----------------------------------------------|--------------------------------|------------------------------|----------------------------------|-----------------------|----------------------------------|-------------------------------|
| Übelkeit/ Erbrechen                           | <input type="radio"/>          | <input type="radio"/>        | <input type="radio"/>            | <input type="radio"/> | <input type="radio"/>            | <input type="radio"/>         |
| Magen-/ Verdauungsbeschwerden                 | <input type="radio"/>          | <input type="radio"/>        | <input type="radio"/>            | <input type="radio"/> | <input type="radio"/>            | <input type="radio"/>         |
| Müdigkeit                                     | <input type="radio"/>          | <input type="radio"/>        | <input type="radio"/>            | <input type="radio"/> | <input type="radio"/>            | <input type="radio"/>         |
| Angstzustände                                 | <input type="radio"/>          | <input type="radio"/>        | <input type="radio"/>            | <input type="radio"/> | <input type="radio"/>            | <input type="radio"/>         |
| Depression/ gedrückte Stimmung                | <input type="radio"/>          | <input type="radio"/>        | <input type="radio"/>            | <input type="radio"/> | <input type="radio"/>            | <input type="radio"/>         |
| Schlaf                                        | <input type="radio"/>          | <input type="radio"/>        | <input type="radio"/>            | <input type="radio"/> | <input type="radio"/>            | <input type="radio"/>         |
| Regelschmerzen/ zyklische Unterbauchschmerzen | <input type="radio"/>          | <input type="radio"/>        | <input type="radio"/>            | <input type="radio"/> | <input type="radio"/>            | <input type="radio"/>         |
| azyklische Unterbauchschmerzen                | <input type="radio"/>          | <input type="radio"/>        | <input type="radio"/>            | <input type="radio"/> | <input type="radio"/>            | <input type="radio"/>         |
| Schmerzen beim Geschlechtsverkehr             | <input type="radio"/>          | <input type="radio"/>        | <input type="radio"/>            | <input type="radio"/> | <input type="radio"/>            | <input type="radio"/>         |
| Schmerzen beim Urin lassen                    | <input type="radio"/>          | <input type="radio"/>        | <input type="radio"/>            | <input type="radio"/> | <input type="radio"/>            | <input type="radio"/>         |
| Schmerzen beim Stuhlgang                      | <input type="radio"/>          | <input type="radio"/>        | <input type="radio"/>            | <input type="radio"/> | <input type="radio"/>            | <input type="radio"/>         |

**129. Haben Sie eine andere Wirkung von Massagen erwartet?**

**MA04**

Ja

Nein

**1 aktive(r) Filter**

**Filter MA04/F1**

Wenn eine der folgenden Antwortoption(en) ausgewählt wurde: **1**  
Dann Frage/Text **MA05** später im Fragebogen anzeigen (sonst ausblenden)

**130. Welche Erwartungen hatten Sie bezüglich Massagen?**

**MA05**

**131. Konnten Massagen die Menge an Medikamenten, die Sie für die Therapie Ihrer endometriosebedingten Symptome normalerweise benötigen reduzieren? (z.B. die Menge an Schmerzmittel)**

**MA06**

Ja, starke Reduktion (über 50%)

Ja, mäßige Reduktion (25-50%)

Ja, geringe Reduktion (unter 25%)

Nein

**132. Wie viel haben Sie durchschnittlich die Massagebehandlungen monatlich gekostet?  
(z.B. monatliche Mitgliedsgebühr, Anfängerkurse)**

MA07

**133. Würden Sie Massagebehandlungen einer Freundin oder einem Familienmitglied mit Endometriose weiterempfehlen?**

MA08

Ja

Nein

**134. Gibt es etwas weiteres, was Sie uns bezüglich Massagebehandlungen mitteilen möchten?**

MA09

135. Wie häufig führen Sie Osteopathie durchschnittlich durch?

OS01

- (mehrmals) täglich
  2-6 mal pro Woche
  einmal wöchentlich
  weniger als einmal wöchentlich

136. Wie ist/war die typische Schmerzstärke unter Osteopathie?

OS10

|                                    |
|------------------------------------|
| 0 kein Schmerz                     |
| 1                                  |
| 2                                  |
| 3                                  |
| 4                                  |
| 5                                  |
| 6                                  |
| 7                                  |
| 8                                  |
| 9                                  |
| 10 stärkster vorstellbarer Schmerz |

137. Auf einer Skala von 0-10, wie effektiv würden Sie das Durchführen von Osteopathie für die Reduktion endometriosebedingten Unterleibsschmerzen beurteilen?

OS02

|                            |
|----------------------------|
| 0 überhaupt nicht effektiv |
| 1                          |
| 2                          |
| 3                          |
| 4                          |
| 5                          |
| 6                          |
| 7                          |
| 8                          |
| 9                          |
| 10 sehr effektiv           |

OS03

**138. Welche und wie effektiv konnten Ihre endometriosebedingten Beschwerden oder Nebenwirkungen von Medikamenten, die Sie aufgrund ihrer Endometriose einnehmen, durch Osteopathie in ihrer Intensität oder Dauer reduziert werden?**

|                                               | starke Verbesserung (über 50%) | mäßige Verbesserung (25-50%) | geringe Verbesserung (unter 25%) | keine Verbesserung    | Verschlechterung der Beschwerden | Ich habe dieses Symptom nicht |
|-----------------------------------------------|--------------------------------|------------------------------|----------------------------------|-----------------------|----------------------------------|-------------------------------|
| Übelkeit/ Erbrechen                           | <input type="radio"/>          | <input type="radio"/>        | <input type="radio"/>            | <input type="radio"/> | <input type="radio"/>            | <input type="radio"/>         |
| Magen-/ Verdauungsbeschwerden                 | <input type="radio"/>          | <input type="radio"/>        | <input type="radio"/>            | <input type="radio"/> | <input type="radio"/>            | <input type="radio"/>         |
| Müdigkeit                                     | <input type="radio"/>          | <input type="radio"/>        | <input type="radio"/>            | <input type="radio"/> | <input type="radio"/>            | <input type="radio"/>         |
| Angstzustände                                 | <input type="radio"/>          | <input type="radio"/>        | <input type="radio"/>            | <input type="radio"/> | <input type="radio"/>            | <input type="radio"/>         |
| Depression/ gedrückte Stimmung                | <input type="radio"/>          | <input type="radio"/>        | <input type="radio"/>            | <input type="radio"/> | <input type="radio"/>            | <input type="radio"/>         |
| Schlaf                                        | <input type="radio"/>          | <input type="radio"/>        | <input type="radio"/>            | <input type="radio"/> | <input type="radio"/>            | <input type="radio"/>         |
| Regelschmerzen/ zyklische Unterbauchschmerzen | <input type="radio"/>          | <input type="radio"/>        | <input type="radio"/>            | <input type="radio"/> | <input type="radio"/>            | <input type="radio"/>         |
| azyklische Unterbauchschmerzen                | <input type="radio"/>          | <input type="radio"/>        | <input type="radio"/>            | <input type="radio"/> | <input type="radio"/>            | <input type="radio"/>         |
| Schmerzen beim Geschlechtsverkehr             | <input type="radio"/>          | <input type="radio"/>        | <input type="radio"/>            | <input type="radio"/> | <input type="radio"/>            | <input type="radio"/>         |
| Schmerzen beim Urin lassen                    | <input type="radio"/>          | <input type="radio"/>        | <input type="radio"/>            | <input type="radio"/> | <input type="radio"/>            | <input type="radio"/>         |
| Schmerzen beim Stuhlgang                      | <input type="radio"/>          | <input type="radio"/>        | <input type="radio"/>            | <input type="radio"/> | <input type="radio"/>            | <input type="radio"/>         |

**139. Haben Sie eine andere Wirkung von der Durchführung von Osteopathie erwartet?**

**OS04**

Ja

Nein

**1 aktive(r) Filter**  
**Filter OS04/F1**  
 [inaktiv] Keine Bedingung ausgewählt  
 Dann Frage/Text **OS05** später im Fragebogen anzeigen (sonst ausblenden)

**140. Welche Erwartungen hatten Sie bezüglich der Durchführung von Osteopathie?**

**OS05**

**141. Konnte die Durchführung von Osteopathie die Menge an Medikamenten, die Sie für die Therapie Ihrer endometriosebedingten Symptome normalerweise benötigen reduzieren? (z.B. die Menge an Schmerzmittel)**

**OS06**

Ja, starke Reduktion (über 50%)

Ja, mäßige Reduktion (25-50%)

Ja, geringe Reduktion (unter 25%)

Nein

**OS07**

**142. Wie viel hat Sie durchschnittlich die Durchführung von Osteopathie monatlich gekostet?  
(z.B. monatliche Mitgliedsgebühr, Anfängerkurse)**

**143. Würden Sie Osteopathie einer Freundin oder einem Familienmitglied mit Endometriose weiterempfehlen?** OS08

Ja

Nein

**144. Gibt es etwas weiteres, was Sie uns bezüglich Osteopathie mitteilen möchten?** OS09

145. Wie häufig führen Sie traditionelle chinesische Medizin durchschnittlich durch?

TC01

- (mehrmals) täglich
  2-6 mal pro Woche
  einmal wöchentlich
  weniger als einmal wöchentlich

146. Wie ist/war die typische Schmerzstärke unter Chinesische Medizin?

TC10

|                                    |
|------------------------------------|
| 0 kein Schmerz                     |
| 1                                  |
| 2                                  |
| 3                                  |
| 4                                  |
| 5                                  |
| 6                                  |
| 7                                  |
| 8                                  |
| 9                                  |
| 10 stärkster vorstellbarer Schmerz |

147. Auf einer Skala von 0-10, wie effektiv würden Sie das Durchführen von traditioneller chinesischer Medizin für die Reduktion Ihrer endometriosebedingten Unterleibsschmerzen beurteilen?

TC02

|                            |
|----------------------------|
| 0 überhaupt nicht effektiv |
| 1                          |
| 2                          |
| 3                          |
| 4                          |
| 5                          |
| 6                          |
| 7                          |
| 8                          |
| 9                          |
| 10 sehr effektiv           |

TC03

**148. Welche und wie effektiv konnten Ihre endometriosebedingten Beschwerden oder Nebenwirkungen von Medikamenten, die Sie aufgrund ihrer Endometriose einnehmen durch traditionelle chinesische Medizin reduziert werden?**

|                                               | starke Verbesserung (über 50%) | mäßige Verbesserung (25-50%) | geringe Verbesserung (unter 25%) | keine Verbesserung    | Verschlechterung der Beschwerden | Ich habe dieses Symptom nicht |
|-----------------------------------------------|--------------------------------|------------------------------|----------------------------------|-----------------------|----------------------------------|-------------------------------|
| Übelkeit/ Erbrechen                           | <input type="radio"/>          | <input type="radio"/>        | <input type="radio"/>            | <input type="radio"/> | <input type="radio"/>            | <input type="radio"/>         |
| Magen-/ Verdauungsbeschwerden                 | <input type="radio"/>          | <input type="radio"/>        | <input type="radio"/>            | <input type="radio"/> | <input type="radio"/>            | <input type="radio"/>         |
| Müdigkeit                                     | <input type="radio"/>          | <input type="radio"/>        | <input type="radio"/>            | <input type="radio"/> | <input type="radio"/>            | <input type="radio"/>         |
| Angstzustände                                 | <input type="radio"/>          | <input type="radio"/>        | <input type="radio"/>            | <input type="radio"/> | <input type="radio"/>            | <input type="radio"/>         |
| Depression/ gedrückte Stimmung                | <input type="radio"/>          | <input type="radio"/>        | <input type="radio"/>            | <input type="radio"/> | <input type="radio"/>            | <input type="radio"/>         |
| Schlaf                                        | <input type="radio"/>          | <input type="radio"/>        | <input type="radio"/>            | <input type="radio"/> | <input type="radio"/>            | <input type="radio"/>         |
| Regelschmerzen/ zyklische Unterbauchschmerzen | <input type="radio"/>          | <input type="radio"/>        | <input type="radio"/>            | <input type="radio"/> | <input type="radio"/>            | <input type="radio"/>         |
| azyklische Unterbauchschmerzen                | <input type="radio"/>          | <input type="radio"/>        | <input type="radio"/>            | <input type="radio"/> | <input type="radio"/>            | <input type="radio"/>         |
| Schmerzen beim Geschlechtsverkehr             | <input type="radio"/>          | <input type="radio"/>        | <input type="radio"/>            | <input type="radio"/> | <input type="radio"/>            | <input type="radio"/>         |
| Schmerzen beim Urin lassen                    | <input type="radio"/>          | <input type="radio"/>        | <input type="radio"/>            | <input type="radio"/> | <input type="radio"/>            | <input type="radio"/>         |

**149. Haben Sie eine andere Wirkung von der Durchführung von traditioneller chinesischer Medizin erwartet?** TC04

Ja
  Nein

**1 aktive(r) Filter**

**Filter TC04/F1**

Wenn eine der folgenden Antwortoption(en) ausgewählt wurde: 1

Dann Frage/Text **TC05** später im Fragebogen anzeigen (sonst ausblenden)

**150. Welche Erwartungen hatten Sie bezüglich der Durchführung von traditioneller chinesischer Medizin?** TC05

**151. Konnte die Durchführung von traditioneller chinesischer Medizin die Menge an Medikamenten, die Sie für die Therapie Ihrer endometriosebedingten Symptome normalerweise benötigen reduzieren? (z.B. die Menge an Schmerzmittel)** TC06

Ja, starke Reduktion (über 50%)
  Ja, mäßige Reduktion (25-50%)
 Ja, geringe Reduktion (unter 25%)
 Nein

TC07

**152. Wie viel hat Sie durchschnittlich die Durchführung von traditioneller chinesischer Medizin monatlich gekostet?**

(z.B. monatliche Mitgliedsgebühr, Anfängerkurse)

**153. Würden Sie traditionelle chinesische Medizin einer Freundin oder einem Familienmitglied mit Endometriose weiterempfehlen?** TC08

Ja

Nein

**154. Gibt es etwas weiteres, was Sie uns bezüglich traditioneller chinesischer Medizin mitteilen möchten?** TC09

155. Wie häufig konsumieren Sie Alkohol durchschnittlich?

AL01

- (mehrmals) täglich
  2-6 mal pro Woche
  einmal wöchentlich
  weniger als einmal wöchentlich

156. Wie ist/war die typische Schmerzstärke unter Alkohol?

AL11 

|                                    |
|------------------------------------|
| 0 kein Schmerz                     |
| 1                                  |
| 2                                  |
| 3                                  |
| 4                                  |
| 5                                  |
| 6                                  |
| 7                                  |
| 8                                  |
| 9                                  |
| 10 stärkster vorstellbarer Schmerz |

157. Auf einer Skala von 0-10, wie effektiv würden Sie den Konsum von Alkohol für die Reduktion Ihrer endometriosebedingten Unterleibsschmerzen beurteilen?

AL10

|                            |
|----------------------------|
| 0 überhaupt nicht effektiv |
| 1                          |
| 2                          |
| 3                          |
| 4                          |
| 5                          |
| 6                          |
| 7                          |
| 8                          |
| 9                          |
| 10 sehr effektiv           |

AL03

**158. Welche und wie effektiv konnten Ihre endometriosebedingten Beschwerden oder Nebenwirkungen von Medikamenten, die Sie aufgrund ihrer Endometriose einnehmen, durch den Konsum von Alkohol in ihrer Intensität oder Dauer reduziert werden?**

|                                               | starke Verbesserung (über 50%) | mäßige Verbesserung (25-50%) | geringe Verbesserung (unter 25%) | keine Verbesserung    | Verschlechterung der Beschwerden | Ich habe dieses Symptom nicht |
|-----------------------------------------------|--------------------------------|------------------------------|----------------------------------|-----------------------|----------------------------------|-------------------------------|
| Übelkeit/ Erbrechen                           | <input type="radio"/>          | <input type="radio"/>        | <input type="radio"/>            | <input type="radio"/> | <input type="radio"/>            | <input type="radio"/>         |
| Magen-/ Verdauungsbeschwerden                 | <input type="radio"/>          | <input type="radio"/>        | <input type="radio"/>            | <input type="radio"/> | <input type="radio"/>            | <input type="radio"/>         |
| Müdigkeit                                     | <input type="radio"/>          | <input type="radio"/>        | <input type="radio"/>            | <input type="radio"/> | <input type="radio"/>            | <input type="radio"/>         |
| Angstzustände                                 | <input type="radio"/>          | <input type="radio"/>        | <input type="radio"/>            | <input type="radio"/> | <input type="radio"/>            | <input type="radio"/>         |
| Depression/ gedrückte Stimmung                | <input type="radio"/>          | <input type="radio"/>        | <input type="radio"/>            | <input type="radio"/> | <input type="radio"/>            | <input type="radio"/>         |
| Schlaf                                        | <input type="radio"/>          | <input type="radio"/>        | <input type="radio"/>            | <input type="radio"/> | <input type="radio"/>            | <input type="radio"/>         |
| Regelschmerzen/ zyklische Unterbauchschmerzen | <input type="radio"/>          | <input type="radio"/>        | <input type="radio"/>            | <input type="radio"/> | <input type="radio"/>            | <input type="radio"/>         |
| azyklische Unterbauchschmerzen                | <input type="radio"/>          | <input type="radio"/>        | <input type="radio"/>            | <input type="radio"/> | <input type="radio"/>            | <input type="radio"/>         |
| Schmerzen beim Geschlechtsverkehr             | <input type="radio"/>          | <input type="radio"/>        | <input type="radio"/>            | <input type="radio"/> | <input type="radio"/>            | <input type="radio"/>         |
| Schmerzen beim Urin lassen                    | <input type="radio"/>          | <input type="radio"/>        | <input type="radio"/>            | <input type="radio"/> | <input type="radio"/>            | <input type="radio"/>         |
| Schmerzen beim Stuhlgang                      | <input type="radio"/>          | <input type="radio"/>        | <input type="radio"/>            | <input type="radio"/> | <input type="radio"/>            | <input type="radio"/>         |

**159. Haben Sie eine andere Wirkung von dem Konsum von Alkohol erwartet?**

**AL04**

Ja

Nein

**1 aktive(r) Filter**

**Filter AL04/F1**

Wenn eine der folgenden Antwortoption(en) ausgewählt wurde: 1  
Dann Frage/Text **AL05** später im Fragebogen anzeigen (sonst ausblenden)

**160. Welche Erwartungen hatten Sie bezüglich dem Konsum von Alkohol?**

**AL05**

**161. Konnte der Konsum von Alkohol die Menge an Medikamenten, die Sie für die Therapie Ihrer endometriosebedingten Symptome normalerweise benötigen reduzieren? (z.B. die Menge an Schmerzmittel)**

**AL06**

Ja, starke Reduktion (über 50%)

Ja, mäßige Reduktion (25-50%)

Ja, geringe Reduktion (unter 25%)

Nein

**162. Wie viel hat Sie durchschnittlich der Konsum von Alkohol monatlich gekostet?**

AL07

(z.B. monatliche Mitgliedsgebühr, Anfängerkurse)

**163. Würden Sie den Konsum von Alkohol einer Freundin oder einem Familienmitglied mit Endometriose weiterempfehlen?**

AL08

Ja

Nein

**164. Gibt es etwas weiteres, was Sie uns bezüglich des Konsums von Alkohol mitteilen möchten?**

AL09

165. Wie häufig nehmen Sie natürliche Beruhigungsmittel durchschnittlich ein?

NA01

- (mehrmals) täglich
- 2-6 mal pro Woche
- einmal wöchentlich
- weniger als einmal  
wöchentlich

166. Wie ist/war die typische Schmerzstärke unter natürlichen Beruhigungsmittel?

NA11

|                                    |
|------------------------------------|
| 0 kein Schmerz                     |
| 1                                  |
| 2                                  |
| 3                                  |
| 4                                  |
| 5                                  |
| 6                                  |
| 7                                  |
| 8                                  |
| 9                                  |
| 10 stärkster vorstellbarer Schmerz |

167. Auf einer Skala von 0-10, wie effektiv würden Sie das Einnehmen von natürlichen Beruhigungsmitteln für die Reduktion Ihrer endometriosebedingten Unterleibsschmerzen beurteilen?

NA10

|                            |
|----------------------------|
| 0 überhaupt nicht effektiv |
| 1                          |
| 2                          |
| 3                          |
| 4                          |
| 5                          |
| 6                          |
| 7                          |
| 8                          |
| 9                          |
| 10 sehr effektiv           |

NA03

**168. Welche und wie effektiv konnten Ihre endometriosebedingten Beschwerden oder Nebenwirkungen von Medikamenten, die Sie aufgrund ihrer Endometriose einnehmen, durch natürliche Beruhigungsmittel in ihrer Intensität oder Dauer reduziert werden?**

|                                               | starke Verbesserung (über 50%) | mäßige Verbesserung (25-50%) | geringe Verbesserung (unter 25%) | keine Verbesserung    | Verschlechterung der Beschwerden | Ich habe dieses Symptom nicht |
|-----------------------------------------------|--------------------------------|------------------------------|----------------------------------|-----------------------|----------------------------------|-------------------------------|
| Übelkeit/ Erbrechen                           | <input type="radio"/>          | <input type="radio"/>        | <input type="radio"/>            | <input type="radio"/> | <input type="radio"/>            | <input type="radio"/>         |
| Magen-/ Verdauungsbeschwerden                 | <input type="radio"/>          | <input type="radio"/>        | <input type="radio"/>            | <input type="radio"/> | <input type="radio"/>            | <input type="radio"/>         |
| Müdigkeit                                     | <input type="radio"/>          | <input type="radio"/>        | <input type="radio"/>            | <input type="radio"/> | <input type="radio"/>            | <input type="radio"/>         |
| Angstzustände                                 | <input type="radio"/>          | <input type="radio"/>        | <input type="radio"/>            | <input type="radio"/> | <input type="radio"/>            | <input type="radio"/>         |
| Depression/ gedrückte Stimmung                | <input type="radio"/>          | <input type="radio"/>        | <input type="radio"/>            | <input type="radio"/> | <input type="radio"/>            | <input type="radio"/>         |
| Schlaf                                        | <input type="radio"/>          | <input type="radio"/>        | <input type="radio"/>            | <input type="radio"/> | <input type="radio"/>            | <input type="radio"/>         |
| Regelschmerzen/ zyklische Unterbauchschmerzen | <input type="radio"/>          | <input type="radio"/>        | <input type="radio"/>            | <input type="radio"/> | <input type="radio"/>            | <input type="radio"/>         |
| azyklische Unterbauchschmerzen                | <input type="radio"/>          | <input type="radio"/>        | <input type="radio"/>            | <input type="radio"/> | <input type="radio"/>            | <input type="radio"/>         |
| Schmerzen beim Geschlechtsverkehr             | <input type="radio"/>          | <input type="radio"/>        | <input type="radio"/>            | <input type="radio"/> | <input type="radio"/>            | <input type="radio"/>         |
| Schmerzen beim Urin lassen                    | <input type="radio"/>          | <input type="radio"/>        | <input type="radio"/>            | <input type="radio"/> | <input type="radio"/>            | <input type="radio"/>         |
| Schmerzen beim Stuhlgang                      | <input type="radio"/>          | <input type="radio"/>        | <input type="radio"/>            | <input type="radio"/> | <input type="radio"/>            | <input type="radio"/>         |

**169. Haben Sie eine andere Wirkung von der Einnahme von natürlichen Beruhigungsmitteln erwartet?**

**NA04**

Ja

Nein

**1 aktive(r) Filter**  
**Filter NA04/F1**  
 Wenn eine der folgenden Antwortoption(en) ausgewählt wurde: **1**  
 Dann Frage/Text **NA05** später im Fragebogen anzeigen (sonst ausblenden)

**170. Welche Erwartungen hatten Sie bezüglich der Einnahme von natürliche Beruhigungsmitteln?**

**NA05**

**NA06**

**171. Konnte die Einnahme von natürlichen Beruhigungsmitteln die Menge an Medikamenten, die Sie für die Therapie Ihrer endometriosebedingten Symptome normalerweise benötigen reduzieren? (z.B. die Menge an Schmerzmittel)**

Ja, starke Reduktion (über 50%)

Ja, mäßige Reduktion (25-50%)

Ja, geringe Reduktion (unter 25%)

Nein

**172. Wie viel hat Sie durchschnittlich die Einnahme von natürlichen Beruhigungsmitteln monatlich gekostet?**

NA07

**173. Würden Sie natürliche Beruhigungsmittel einer Freundin oder einem Familienmitglied mit Endometriose weiterempfehlen?**

NA08

Ja

Nein

**174. Gibt es etwas weiteres, was Sie uns bezüglich der Einnahme von natürlichen Beruhigungsmitteln mitteilen möchten?**

NA09

175. Wie häufig ernähren Sie dich durchschnittlich nach einer bestimmten Diät oder Ernährungsform (z.B. Paleo-Diät, pflanzenbasierte Kost, FODMAP-Diät)? ER01

(mehrmals) täglich

2-6 mal pro Woche

einmal wöchentlich

weniger als einmal wöchentlich

176. Wie ist/war die typische Schmerzstärke unter Ernährung?

ER11

|                                    |
|------------------------------------|
| 0 kein Schmerz                     |
| 1                                  |
| 2                                  |
| 3                                  |
| 4                                  |
| 5                                  |
| 6                                  |
| 7                                  |
| 8                                  |
| 9                                  |
| 10 stärkster vorstellbarer Schmerz |

177. Auf einer Skala von 0-10, wie effektiv würden Sie Ihre Ernährungsweise für die Reduktion Ihrer endometriosebedingten Unterleibsschmerzen beurteilen?

ER10

|                            |
|----------------------------|
| 0 überhaupt nicht effektiv |
| 1                          |
| 2                          |
| 3                          |
| 4                          |
| 5                          |
| 6                          |
| 7                          |
| 8                          |
| 9                          |
| 10 sehr effektiv           |

ER03

**178. Welche und wie effektiv konnten Ihre endometriosebedingten Beschwerden oder Nebenwirkungen von Medikamenten, die Sie aufgrund ihrer Endometriose einnehmen, durch Ihre Ernährungsweise in ihrer Intensität oder Dauer reduziert werden?**

|                                               | starke Verbesserung (über 50%) | mäßige Verbesserung (25-50%) | geringe Verbesserung (unter 25%) | keine Verbesserung    | Verschlechterung der Beschwerden | Ich habe dieses Symptom nicht |
|-----------------------------------------------|--------------------------------|------------------------------|----------------------------------|-----------------------|----------------------------------|-------------------------------|
| Übelkeit/ Erbrechen                           | <input type="radio"/>          | <input type="radio"/>        | <input type="radio"/>            | <input type="radio"/> | <input type="radio"/>            | <input type="radio"/>         |
| Magen-/ Verdauungsbeschwerden                 | <input type="radio"/>          | <input type="radio"/>        | <input type="radio"/>            | <input type="radio"/> | <input type="radio"/>            | <input type="radio"/>         |
| Müdigkeit                                     | <input type="radio"/>          | <input type="radio"/>        | <input type="radio"/>            | <input type="radio"/> | <input type="radio"/>            | <input type="radio"/>         |
| Angstzustände                                 | <input type="radio"/>          | <input type="radio"/>        | <input type="radio"/>            | <input type="radio"/> | <input type="radio"/>            | <input type="radio"/>         |
| Depression/ gedrückte Stimmung                | <input type="radio"/>          | <input type="radio"/>        | <input type="radio"/>            | <input type="radio"/> | <input type="radio"/>            | <input type="radio"/>         |
| Schlaf                                        | <input type="radio"/>          | <input type="radio"/>        | <input type="radio"/>            | <input type="radio"/> | <input type="radio"/>            | <input type="radio"/>         |
| Regelschmerzen/ zyklische Unterbauchschmerzen | <input type="radio"/>          | <input type="radio"/>        | <input type="radio"/>            | <input type="radio"/> | <input type="radio"/>            | <input type="radio"/>         |
| azyklische Unterbauchschmerzen                | <input type="radio"/>          | <input type="radio"/>        | <input type="radio"/>            | <input type="radio"/> | <input type="radio"/>            | <input type="radio"/>         |
| Schmerzen beim Geschlechtsverkehr             | <input type="radio"/>          | <input type="radio"/>        | <input type="radio"/>            | <input type="radio"/> | <input type="radio"/>            | <input type="radio"/>         |
| Schmerzen beim Urin lassen                    | <input type="radio"/>          | <input type="radio"/>        | <input type="radio"/>            | <input type="radio"/> | <input type="radio"/>            | <input type="radio"/>         |
| Schmerzen beim Stuhlgang                      | <input type="radio"/>          | <input type="radio"/>        | <input type="radio"/>            | <input type="radio"/> | <input type="radio"/>            | <input type="radio"/>         |

**179. Haben Sie eine andere Wirkung von Ihrer Ernährungsweise erwartet?**

**ER04**

Ja

Nein

**1 aktive(r) Filter**

**Filter ER04/F1**

Wenn eine der folgenden Antwortoption(en) ausgewählt wurde: 1  
Dann Frage/Text **ER05** später im Fragebogen anzeigen (sonst ausblenden)

**180. Welche Erwartungen hatten Sie bezüglich Ihrer Ernährungsweise?**

**ER05**

**181. Konnte Ihre Ernährungsweise die Menge an Medikamenten, die Sie für die Therapie Ihrer endometriosebedingten Symptome normalerweise benötigen reduzieren? (z.B. die Menge an Schmerzmittel)**

**ER06**

Ja, starke Reduktion (über 50%)

Ja, mäßige Reduktion (25-50%)

Ja, geringe Reduktion (unter 25%)

Nein

**182. Wie viel hat Sie durchschnittlich Ihre Ernährungsweise monatlich gekostet?**

ER07

bitte die Kosten angeben, die über Ihre normalen Lebensmittelkosten hinaus entstanden sind

**183. Würden Sie Ihre Ernährungsweise einer Freundin oder einem Familienmitglied mit Endometriose weiterempfehlen?**

ER08

Ja

Nein

**184. Gibt es etwas weiteres, was Sie uns bezüglich Ihrer Ernährungsweise mitteilen möchten?**

ER09

185. Wie häufig nehmen Sie Hanf-/CBD-Öl durchschnittlich ein?

OL01

- (mehrmals) täglich
  2-6 mal pro Woche
  einmal wöchentlich
  weniger als einmal wöchentlich

186. Wie ist/war die typische Schmerzstärke unter Hanf-/CBD-Öl?

OL11

|                                    |
|------------------------------------|
| 0 kein Schmerz                     |
| 1                                  |
| 2                                  |
| 3                                  |
| 4                                  |
| 5                                  |
| 6                                  |
| 7                                  |
| 8                                  |
| 9                                  |
| 10 stärkster vorstellbarer Schmerz |

187. Auf einer Skala von 0-10, wie effektiv würden Sie die Einnahme von Hanf-/CBD-Öl für die Reduktion endometriosebedingten Unterleibsschmerzen beurteilen?

OL10

|                            |
|----------------------------|
| 0 überhaupt nicht effektiv |
| 1                          |
| 2                          |
| 3                          |
| 4                          |
| 5                          |
| 6                          |
| 7                          |
| 8                          |
| 9                          |
| 10 sehr effektiv           |

OL03

**188. Welche und wie effektiv konnten Ihre endometriosebedingten Beschwerden oder Nebenwirkungen von Medikamenten, die Sie aufgrund ihrer Endometriose einnehmen, durch die Einnahme von Hanf-/CBD-Öl in ihrer Intensität oder Dauer reduziert werden?**

|                                                     | starke<br>Verbesserung<br>(über 50%) | mäßige<br>Verbesserung<br>(25-50%) | geringe<br>Verbesserung<br>(unter 25%) | keine<br>Verbesserung | Verschlechterung<br>der Beschwerden | Ich habe dieses<br>Symptom nicht |
|-----------------------------------------------------|--------------------------------------|------------------------------------|----------------------------------------|-----------------------|-------------------------------------|----------------------------------|
| Übelkeit/ Erbrechen                                 | <input type="radio"/>                | <input type="radio"/>              | <input type="radio"/>                  | <input type="radio"/> | <input type="radio"/>               | <input type="radio"/>            |
| Magen-/<br>Verdauungsbeschwerden                    | <input type="radio"/>                | <input type="radio"/>              | <input type="radio"/>                  | <input type="radio"/> | <input type="radio"/>               | <input type="radio"/>            |
| Müdigkeit                                           | <input type="radio"/>                | <input type="radio"/>              | <input type="radio"/>                  | <input type="radio"/> | <input type="radio"/>               | <input type="radio"/>            |
| Angstzustände                                       | <input type="radio"/>                | <input type="radio"/>              | <input type="radio"/>                  | <input type="radio"/> | <input type="radio"/>               | <input type="radio"/>            |
| Depression/ gedrückte<br>Stimmung                   | <input type="radio"/>                | <input type="radio"/>              | <input type="radio"/>                  | <input type="radio"/> | <input type="radio"/>               | <input type="radio"/>            |
| Schlaf                                              | <input type="radio"/>                | <input type="radio"/>              | <input type="radio"/>                  | <input type="radio"/> | <input type="radio"/>               | <input type="radio"/>            |
| Regelschmerzen/<br>zyklische<br>Unterbauchschmerzen | <input type="radio"/>                | <input type="radio"/>              | <input type="radio"/>                  | <input type="radio"/> | <input type="radio"/>               | <input type="radio"/>            |
| azyklische<br>Unterbauchschmerzen                   | <input type="radio"/>                | <input type="radio"/>              | <input type="radio"/>                  | <input type="radio"/> | <input type="radio"/>               | <input type="radio"/>            |
| Schmerzen beim<br>Geschlechtsverkehr                | <input type="radio"/>                | <input type="radio"/>              | <input type="radio"/>                  | <input type="radio"/> | <input type="radio"/>               | <input type="radio"/>            |
| Schmerzen beim Urin<br>lassen                       | <input type="radio"/>                | <input type="radio"/>              | <input type="radio"/>                  | <input type="radio"/> | <input type="radio"/>               | <input type="radio"/>            |
| Schmerzen beim<br>Stuhlgang                         | <input type="radio"/>                | <input type="radio"/>              | <input type="radio"/>                  | <input type="radio"/> | <input type="radio"/>               | <input type="radio"/>            |

**189. Haben Sie eine andere Wirkung von der Einnahme von Hanf-/CBD-Öl erwartet?**

**OL04**

Ja

Nein

**1 aktive(r) Filter**

**Filter OL04/F1**

Wenn eine der folgenden Antwortoption(en) ausgewählt wurde: 1  
Dann Frage/Text **OL05** später im Fragebogen anzeigen (sonst ausblenden)

**190. Welche Erwartungen hatten Sie bezüglich der Einnahme von Hanf-/CBD-Öl?**

**OL05**

**191. Konnte die Einnahme von Hanf-/CBD-Öl die Menge an Medikamenten, die Sie für die Therapie Ihrer endometriosebedingten Symptome normalerweise benötigen reduzieren? (z.B. die Menge an Schmerzmittel)**

**OL06**

Ja, starke Reduktion (über  
50%)

Ja, mäßige Reduktion (25-  
50%)

Ja, geringe Reduktion (unter  
25%)

Nein

**192. Wie viel hat Sie durchschnittlich die Einnahme von Hanf-/CBD-Öl monatlich gekostet?**

OL07

**193. Würden Sie Hanf-/CBD-Öl einer Freundin oder einem Familienmitglied mit Endometriose weiterempfehlen?**

OL08

Ja

Nein

**194. Gibt es etwas weiteres, was Sie uns bezüglich Einnahme von Hanf-/CBD-Öl mitteilen möchten?**

OL09

195. Wie häufig konsumieren Sie Cannabis in den folgenden Formen durchschnittlich?

CA01

|                                        | (mehrmals)<br>täglich | 2-6<br>mal<br>pro<br>Woche | einmal<br>wöchentlich | weniger als<br>einmal<br>wöchentlich |
|----------------------------------------|-----------------------|----------------------------|-----------------------|--------------------------------------|
| Rauchen                                | <input type="radio"/> | <input type="radio"/>      | <input type="radio"/> | <input type="radio"/>                |
| Sisha/ Wasserpipe                      | <input type="radio"/> | <input type="radio"/>      | <input type="radio"/> | <input type="radio"/>                |
| in Lebensmitteln (Kekse, Brownies,...) | <input type="radio"/> | <input type="radio"/>      | <input type="radio"/> | <input type="radio"/>                |
| Sonstige                               | <input type="radio"/> | <input type="radio"/>      | <input type="radio"/> | <input type="radio"/>                |

196. Wie ist/war die typische Schmerzstärke unter Cannabis?

CA11

|                                    |
|------------------------------------|
| 0 kein Schmerz                     |
| 1                                  |
| 2                                  |
| 3                                  |
| 4                                  |
| 5                                  |
| 6                                  |
| 7                                  |
| 8                                  |
| 9                                  |
| 10 stärkster vorstellbarer Schmerz |

197. Auf einer Skala von 0-10, wie effektiv würden Sie den Konsum von Cannabis für die Reduktion Ihrer endometriosebedingten Unterleibsschmerzen beurteilen?

CA10

|                            |
|----------------------------|
| 0 überhaupt nicht effektiv |
| 1                          |
| 2                          |
| 3                          |
| 4                          |
| 5                          |
| 6                          |
| 7                          |
| 8                          |
| 9                          |
| 10 sehr effektiv           |

CA03

**198. Welche und wie effektiv konnten Ihre endometriosebedingten Beschwerden oder Nebenwirkungen von Medikamenten, die Sie aufgrund ihrer Endometriose einnehmen, durch den Konsum von Cannabis in ihrer Intensität oder Dauer reduziert werden?**

|                                               | starke Verbesserung (über 50%) | mäßige Verbesserung (25-50%) | geringe Verbesserung (unter 25%) | keine Verbesserung    | Verschlechterung der Beschwerden | Ich habe dieses Symptom nicht |
|-----------------------------------------------|--------------------------------|------------------------------|----------------------------------|-----------------------|----------------------------------|-------------------------------|
| Übelkeit/ Erbrechen                           | <input type="radio"/>          | <input type="radio"/>        | <input type="radio"/>            | <input type="radio"/> | <input type="radio"/>            | <input type="radio"/>         |
| Magen-/ Verdauungsbeschwerden                 | <input type="radio"/>          | <input type="radio"/>        | <input type="radio"/>            | <input type="radio"/> | <input type="radio"/>            | <input type="radio"/>         |
| Müdigkeit                                     | <input type="radio"/>          | <input type="radio"/>        | <input type="radio"/>            | <input type="radio"/> | <input type="radio"/>            | <input type="radio"/>         |
| Angstzustände                                 | <input type="radio"/>          | <input type="radio"/>        | <input type="radio"/>            | <input type="radio"/> | <input type="radio"/>            | <input type="radio"/>         |
| Depression/ gedrückte Stimmung                | <input type="radio"/>          | <input type="radio"/>        | <input type="radio"/>            | <input type="radio"/> | <input type="radio"/>            | <input type="radio"/>         |
| Schlaf                                        | <input type="radio"/>          | <input type="radio"/>        | <input type="radio"/>            | <input type="radio"/> | <input type="radio"/>            | <input type="radio"/>         |
| Regelschmerzen/ zyklische Unterbauchschmerzen | <input type="radio"/>          | <input type="radio"/>        | <input type="radio"/>            | <input type="radio"/> | <input type="radio"/>            | <input type="radio"/>         |
| azyklische Unterbauchschmerzen                | <input type="radio"/>          | <input type="radio"/>        | <input type="radio"/>            | <input type="radio"/> | <input type="radio"/>            | <input type="radio"/>         |
| Schmerzen beim Geschlechtsverkehr             | <input type="radio"/>          | <input type="radio"/>        | <input type="radio"/>            | <input type="radio"/> | <input type="radio"/>            | <input type="radio"/>         |
| Schmerzen beim Urin lassen                    | <input type="radio"/>          | <input type="radio"/>        | <input type="radio"/>            | <input type="radio"/> | <input type="radio"/>            | <input type="radio"/>         |
| Schmerzen beim Stuhlgang                      | <input type="radio"/>          | <input type="radio"/>        | <input type="radio"/>            | <input type="radio"/> | <input type="radio"/>            | <input type="radio"/>         |

**199. Haben Sie eine andere Wirkung von dem Konsum von Cannabis erwartet?**

CA04

Ja

Nein

**1 aktive(r) Filter**

**Filter CA04/F1**

Wenn eine der folgenden Antwortoption(en) ausgewählt wurde: 1  
Dann Frage/Text **CA05** später im Fragebogen anzeigen (sonst ausblenden)

**200. Welche Erwartungen hatten Sie bezüglich des Konsums von Cannabis?**

CA05

**201. Konnte den Konsum von Cannabis die Menge an Medikamenten, die Sie für die Therapie Ihrer endometriosebedingten Symptome normalerweise benötigen reduzieren? (z.B. die Menge an Schmerzmittel)**

CA06

Ja, starke Reduktion (über 50%)

Ja, mäßige Reduktion (25-50%)

Ja, geringe Reduktion (unter 25%)

Nein

**202. Wie viel hat Sie durchschnittlich der Konsum von Cannabis monatlich gekostet?**

CA07

**203. Würden Sie Cannabis einer Freundin oder einem Familienmitglied mit Endometriose weiterempfehlen?**

CA08

Ja

Nein

**204. Gibt es etwas weiteres, was Sie uns bezüglich des Konsums von Cannabis mitteilen möchten?**

CA09

**205. Würden Sie die folgenden Substanzen für die Bewältigung Ihrer endometriosebedingten Schmerzen ausprobieren wollen?**

KL01

|                            | Ja                    | Nein                  |
|----------------------------|-----------------------|-----------------------|
| Cannabidiol – CBD          | <input type="radio"/> | <input type="radio"/> |
| Tetrahydrocannabinol – THC | <input type="radio"/> | <input type="radio"/> |

**206. Würden Sie die folgenden Substanzen für die Bewältigung Ihrer endometriosebedingten Schmerzen ausprobieren wollen, wenn diese von Ihrem Arzt rezeptpflichtig verschrieben werden würden?**

KL02

|                            | Ja                    | Nein                  |
|----------------------------|-----------------------|-----------------------|
| Cannabidiol – CBD          | <input type="radio"/> | <input type="radio"/> |
| Tetrahydrocannabinol – THC | <input type="radio"/> | <input type="radio"/> |

**207. In welcher Verabreichungsform würden Sie CBD einnehmen?**

KL03

|                                  | Ja                    | Nein                  |
|----------------------------------|-----------------------|-----------------------|
| oral (z.B als Tablette, Tropfen) | <input type="radio"/> | <input type="radio"/> |
| sublingual/unter der Zunge       | <input type="radio"/> | <input type="radio"/> |
| Hautpflaster                     | <input type="radio"/> | <input type="radio"/> |
| Creme/Gel                        | <input type="radio"/> | <input type="radio"/> |
| Scheidenzäpfchen                 | <input type="radio"/> | <input type="radio"/> |
| weitere                          | <input type="radio"/> | <input type="radio"/> |

**208. In welcher Verabreichungsform würden Sie THC einnehmen?**

KL04

|                                  | Ja                    | Nein                  |
|----------------------------------|-----------------------|-----------------------|
| oral (z.B als Tablette, Tropfen) | <input type="radio"/> | <input type="radio"/> |
| sublingual/unter der Zunge       | <input type="radio"/> | <input type="radio"/> |
| Hautpflaster                     | <input type="radio"/> | <input type="radio"/> |
| Creme/Gel                        | <input type="radio"/> | <input type="radio"/> |
| Scheidenzäpfchen                 | <input type="radio"/> | <input type="radio"/> |
| weitere                          | <input type="radio"/> | <input type="radio"/> |

KL05

**209. Wären Sie daran interessiert an einer klinischen Studie teilzunehmen, die die Einnahme folgender Substanzen beinhaltet und untersucht?**

|                          | Ja                    | Nein                  |
|--------------------------|-----------------------|-----------------------|
| CBD                      | <input type="radio"/> | <input type="radio"/> |
| THC                      | <input type="radio"/> | <input type="radio"/> |
| CBD + THC in Kombination | <input type="radio"/> | <input type="radio"/> |

---

**Letzte Seite****Vielen Dank für Ihre Teilnahme!**

Wir möchten uns ganz herzlich für Ihre Mithilfe bedanken.

Ihre Antworten wurden gespeichert, Sie können das Browser-Fenster nun schließen.

---

[Dr. Sylvia Mechsner und Renata Voltolini Velho, PhD Endometriosezentrum, Charité - Universitätsmedizin Berlin – 2022](https://survey.charite.de/CannabisEM/?preview=FISC25AU57dQuhbQHcXCqZtbPmj5Pjgg&questionnaire=base&csrf)
